*MECHANISMS OF INTERACTION OF STAPHYLOCOCCUS  
AUREUS WITH HUMAN MESENCHYMAL STEM CELLS AND  
THEIR DIFFERENTIATED PHENOTYPES*

Nibras Khamees, Darryl J. Hill\* and Wael Kafienah\*

*School of Cellular and Molecular Medicine, Faculty of Life Sciences, University of Bristol,  
Bristol, UK.*

\* Corresponding authors: [darryl.j.hill@bristol.ac.uk](mailto:darryl.j.hill@bristol.ac.uk), [w.z.kafienah@bristol.ac.uk](mailto:w.z.kafienah@bristol.ac.uk)

## Abstract

Mesenchymal stem cells (MSCs) are multipotent cells commonly derived from the bone marrow, adipose tissue and placenta. Human bone marrow derived MSCs migrate to a site of injury, release proinflammatory cytokines and modulate T-cell proliferation. At sites of injury, MSCs may well encounter bacterial pathogens most commonly the Gram positive pathogen *Staphylococcus aureus*. However, the precise molecular mechanism(s) of this interaction remain to be elucidated. In the present study we aim to show if a direct interaction occurs between *S. aureus* and bone marrow derived MSCs and identify if MSCRAMMs have a role in this interaction. We further aim to compare *S. aureus* interaction with cells that differentiate from MSCs, namely; osteoblasts, adipocytes and chondrocytes, since MSCs co-exist in the niche of these cells. Our results showed that *S. aureus* is able to interact with MSCs in the form of adhesion and invasion to the cells, and that this interaction is largely dependent on the expression of fibronectin-binding protein (FnBP) by *S. aureus*. We also showed that the same mechanism of interaction to osteoblasts, adipocytes and chondrocytes that are directly differentiated from the same MSCs. Finally, we have found that the presence of 10% FBS in the infection medium is essential as it helps in achieving the best specific bacterial-cell association with the least background association. The results reveals a mechanism of interaction between *S. aureus* and MSCs that could pave the way for therapeutic intervention that minimises the burden of infection in inflammatory diseases.

## 1 Introduction

2 Mesenchymal stem cells (MSCs) are a heterogeneous population of cells commonly derived  
3 from bone marrow, adipose tissue and placenta (1). The major characteristics of MSCs, are  
4 their fibroblast like morphology, their ability to adhere to plastic and their ability to  
5 differentiate along the osteogenic, chondrogenic and adipogenic pathways. The mechanism  
6 underlying the differentiation process is complex and involves the coordinated action of several  
7 cytokines, growth factors and other proteins (2). In addition to their ability to differentiate,  
8 MSCs have the ability to repair damaged tissues and possess immunomodulatory properties  
9 (3). Human bone marrow derived MSCs migrate to a site of injury, release proinflammatory  
10 cytokines and modulate T-cell proliferation following ligand binding to toll like receptor  
11 (TLR)3 and 4 (4). At sites of injury, MSCs may well encounter bacterial pathogens. Josse et  
12 al, 2014, for example, identified a direct interaction between MSC derived from Wharton's  
13 jelly and the Gram positive pathogen *Staphylococcus aureus* (5). However, the precise  
14 molecular details of this interaction remain to be elucidated.

15 *S. aureus*, is a common cause of focal as well as disseminated diseases. *S. aureus* can enter the  
16 blood and from there cause infections of the cardiac valves, endocarditis and bone tissue,  
17 causing septic arthritis and osteomyelitis (6). An inflammatory condition of the bone,  
18 osteomyelitis can involve the cortical or trabecular bone as well as the periosteum and bone  
19 marrow (Add Maffulli et al 2016). Epidemiological data suggest that *S. aureus* is responsible  
20 for ~80% of osteomyelitis cases (7). Thus it is plausible the *S aureus* and MSC's could come  
21 into direct contact with each other during osteomyelitis involving the bone marrow.

22 *S. aureus* possess numerous virulence factors which play a role in the development and  
23 progression of disease, through promoting the association and invasion of bacteria, protection  
24 of bacteria from host defence mechanisms, and causing damage to tissue during infection (8).  
25 A major group of virulence factors produced by *S. aureus* are the Microbial Surface Component  
26 Recognising Adhesive Matrix Molecules (MSCRAMM's). Such molecules play an important  
27 role in mediating bacterial interactions with a number of extracellular matrix proteins  
28 including, fibronectin, fibrinogen, bone sialoprotein, collagen, and elastin (9-11). Moreover,  
29 such interactions allow bacteria to use the extracellular matrix proteins to form a molecular  
30 bridge between host cell receptors and bacterial surface proteins (12). *S. aureus* can use  
31 MSCRAMMs such as the fibronectin binding proteins (FnBPA and FnBPB), infect a number  
32 of mammalian cell type, including epithelial cells (16, 19), endothelial cells (16, 20), fibroblasts  
33 (16), and osteoblasts (17, 21-23). Surface proteins such as MSCRAMMs are often implicated  
34 in this process and In support of this, a number of studies have demonstrated that the invasion  
35 of host cells is poor by *S. aureus* mutants lacking the expression of FnBPs, both or each one  
36 alone (16, 17). Arciola *et al.* stated that from a variety of orthopaedic infections, 98% and 99%  
37 of clinical isolates possessed *fnbA* and *fnbB* respectively, while only 46% of the isolates express  
38 *cna* (a gene encoding collagen binding protein) (18).

39  
40 In the present study we aim to show if a direct interaction occurs between *S. aureus* and bone  
41 marrow derived MSCs and identify if MSCRAMMs have a role in this interaction. We further  
42 aim to compare *S. aureus* interaction with cells that differentiate from MSCs, namely;  
43 osteoblasts, adipocytes and chondrocytes.

44

45

## 46 **Materials and Methods**

47

### 48 **Isolation and expansion of Mesenchymal stem cells**

49 Bone marrow aspirates were collected into heparinised tubes to avoid samples clotting.  
50 Subsequently, 1 ml of each aspirate was dispersed in T175 culture flasks containing 25 ml of  
51 low glucose Dulbecco's Modified Eagle's Medium (DMEM) (Sigma, Dorset, UK),  
52 supplemented with 10% (v/v) FBS, 1% penicillin/streptomycin, 1% (v/v) glutamax, and 10  
53 ng/ml FGF-2. After XXX days, population purity and phenotype were assessed by flow  
54 cytometry. Human MSCs at passage 4 were seeded into 96 well plates at a density of 5000  
55 cells/cm<sup>2</sup> until confluence and used for differentiation or infection experiments as described  
56 below.

### 57 **Mesenchymal stem cell differentiation**

58 MSCs differentiation was effected using aHuman Mesenchymal Stem Cell Functional  
59 Identification Kit, (R&D Systems, Inc.) according to the manufacturer's instructions.  
60 Following differentiation the resulting osteoblasts, adipocytes and chondrocytes were seeded  
61 into 96 well plates and grown to confluency for subsequent infection experiments.

### 62 **Bacterial Strains**

63 *Staphylococcus aureus* 8325.4 and corresponding *Staphylococcus epidermidis* (used as a  
64 negative control for *S. aureus* interaction), as listed in table 1, were obtained from Dr Andrew  
65 Edwards, University of Bath.

66

67 **Table 1.** Different bacterial strains used in the experiments.

| Bacteria                          | Strain                                                          | Abbreviation   |
|-----------------------------------|-----------------------------------------------------------------|----------------|
| <i>Staphylococcus aureus</i>      | 8325.4 wild type                                                | WT             |
|                                   | 8325.4 Delta <i>fnbA/fnbB</i>                                   | (ΔFnBP A/B     |
|                                   | 8325.4 Delta <i>fnbA/fnbB</i> complemented with plasmid pFnBPA4 | (ΔFnBP A/B p4A |
| <i>Staphylococcus epidermidis</i> | 1457                                                            |                |

68

69 All bacteria were cultured on Mueller-Hinton agar (MHA) plates and grown at 37 °C for 16  
70 hours in a humidified incubator with 5% CO<sub>2</sub>.

### 71 **Cell infection assays**

72 *S. aureus* (WT and mutants) and *S. epidermidis* were harvested from MHA agar, resuspended  
73 in phosphate buffered saline (PBS) and optical density measured at 600nm. Bacterial  
74 suspensions were adjusted to an appropriate multiplicity of infection (MOI) in PBS based upon  
75 an optical density of 1 at 600 nm being equivalent to 2x10<sup>9</sup> colony forming units (CFU)/ml  
76 for *S. aureus* and 0.9 x10<sup>9</sup> CFU/ml for *S. epidermidis*.

77 MSCs in 96 well plate were washed to remove antibiotics and incubated with each bacterial  
78 species at a multiplicity of infection (MOI) of 100 in 100 μl of infection medium (DMEM  
79 supplemented with glutamax, and FGF-2). In each case cells were infected for 90 min at 37°C

80 in 5% CO<sub>2</sub>. In order to determine the effect of FBS, Human serum and plasma fibronectin on  
81 bacterial adhesion, infection medium was supplemented with either 10% FBS, 10% heat  
82 inactivated human serum (HuSer), or 400 µg/ml plasma fibronectin (Fn). (comparable to the  
83 Fn concentration in human plasma which is 300-400 µg/ml (26)) and low glucose DMEM with  
84 10% decompemented human serum (HuSer). At the end of each infection assay unbound  
85 bacterial cells were removed by washing each well 4 times with appropriate infection media.

#### 86 Immunofluorescence Microcopy

87 Cells were then fixed in 2% PFA (paraformaldehyde) overnight at 4°C. Wells were  
88 subsequently washed with dH<sub>2</sub>O for 5 minutes and non-specific binding sites blocked for 1h at  
89 room temperature (RT), with 3% bovine serum albumin (BSA) in PBS. . Bacteria were detected  
90 using Rabbit anti- *S. aureus* polyclonal antibody (Abd Serotec; 2 µg/ ml in 1% BSA) or Mouse  
91 anti- *S. epidermidis* (Thermo scientific; 3 µg/ ml in 1% BSA). MSC's were labelled with anti-  
92 vimentin monoclonal antibody (Sigma; 1 µg/ ml in 1% BSA). Primary antibodies were detected  
93 using 1 µg/ ml of anti-rabbit Alexa Fluor 594 or anti-mouse Alexa Fluor 488 in 1% BSA as  
94 appropriate (Invitrogen). All antibodies were incubated at room temperature for 1 hr, then wells  
95 were washed 3 times for 5 minutes (PBS with 0.05% v/v Tween 20). Finally, 100 µl of 4',6-  
96 Diamidine-2-Phenylindole (DAPI; 1 µg/ ml in PBS) was added to each wells for 30 min to  
97 stain nuclei. Plates were stored in PBS containing 0.05% sodium azide. Images were captured  
98 using a Hamamatsu digital camera attached to an Olympus IX70 microscope via Image HCI  
99 software.

100 Bacterial quantification In order to determine nuber of bacteria associated with each cell type,  
101 following washing to remove unbound bacteria, well were incubated with with 1% Saponin  
102 for 30min at 37°C. Dilutions were cultured on MHA plates and viable colony forming units  
103 (CFU) counted in order to determine the number of bacteria per well. In order to differentiate  
104 invasive from associated bacteria prior to addition of saponin, well were incubated with  
105 gentamicin (250 µg/ml for 90min at 37oC) in order to kill extracellular bacteria control wells  
106 included the addition of cytochalasin D (Conc to add) which prevents uptake of *S. aureus*.  
107 Following the incubation with gentamicin, wells were washed 3 times and CFU determined  
108 as above.

#### 109 Statistical Analysis

110 All experiments were performed in triplicate using cells from 3 different patients. Data were  
111 evaluated using GraphPad Prism software version 6 (GraphPad Software, La Jolla, CA). Data  
112 are expressed as means ± SD, unless otherwise specified and one-way ANOVA test was used  
113 to determine the statistical significance, followed by Tukey's Multiple Comparison Test to  
114 compare individual test groups. P values of ≤ 0.05 were considered significant.

115  
116

117

## 118 **Results**

### 119 **Immunofluorescence adhesion assay**

#### 120 **Adhesion of *S. aureus* to MSCs and the role of FnBP**

121 *S. aureus* WT was able to adhere to MSCs as shown in Fig. 1(A) and this adhesion was greatly  
122 reduced in the absence of FnBP with the use of  $\Delta$ FnBPA/B mutant bacteria lacking the  
123 expression of FnBP as shown in Fig. 1(B), while the bacterial adhesion was greatly enhanced  
124 (more than that with WT) with use of *S. aureus* pFnBPA4 mutant ( $\Delta$ FnBPA/B supplemented  
125 with plasmid expressing only the intact FnBP A) as shown in Fig.1 (C). While Fig.1 (D) showed  
126 that *S. epidermidis* 1457 fail to adhere to MSCs. The results shown in the figure 1 confirmed  
127 adherence of *S. aureus* to MSCs and that the expression of FnBP by bacteria might facilitate  
128 this adherence. Also, FnBP A is capable of supporting the adhesion as adherence is improved  
129 with the use of *S. aureus* pFnBPA4 mutant.

#### 130 **Adhesion of *S. aureus* to differentiated osteoblasts and the role of FnBP**

131 As was the case for MSCs, *S. aureus* WT was capable of adherence to osteoblasts as shown in  
132 Fig. 2(A) and that the use of  $\Delta$ FnBPA/B mutant bacteria lacking the expression of FnBP  
133 resulted in great reduction in bacterial adhesion as shown in Fig. 2(B). In comparison, wells  
134 with *S. aureus* pFnBPA4 mutant ( $\Delta$ FnBPA/B supplemented with plasmid expressing only the  
135 intact FnBP A (Fig.2 (C)) showed great enhancement in bacterial adhesion (more than that with  
136 WT). While Fig.2 (D) showed that very few of *S. epidermidis* 1457 bacteria were able to adhere  
137 to osteoblasts in contrast to MSCs where there was no adherence. These results confirmed the  
138 ability of *S. aureus* to adhere to osteoblasts which depends largely on the expression of FnBP  
139 by the bacteria and that FnBP type supports this adhesion.

#### 140 **Adhesion of *S. aureus* to differentiated adipocytes and the role of FnBP**

141 The results were comparable to that of osteoblasts regarding the adhesion capabilities of *S.*  
142 *aureus* WT to adipocytes and the great reduction in adhesion with the use of  $\Delta$ FnBPA/B mutant  
143 bacteria which is restored again and to a higher degree with the use of *S. aureus* pFnBPA4  
144 mutant as shown in Fig.3 (A), (B), and (C). Also, Fig.3 (D) showed similar trend for *S.*  
145 *epidermidis* 1457 with very few bacterial adherence. This states the importance of *S. aureus*  
146 FnBP expression in their adherence to adipocytes.

#### 147 **Adhesion of *S. aureus* to differentiated chondrocytes and the role of FnBP**

148 The results shown in Fig.4 (A), (B), and (C) confirmed that *S. aureus* WT was able to adhere  
149 to chondrocytes and the absence of FnBP (with the use of  $\Delta$ FnBPA/B mutant bacteria) greatly  
150 affected the adhesion in a negative way, while the use of *S. aureus* pFnBPA4 mutant greatly  
151 enhanced adhesion capability of *S. aureus*, even to a higher degree than WT strain. Also, *S.*  
152 *epidermidis* 1457 strain was unable to adhere to chondrocytes as shown in Fig.4 (D). These  
153 results stated a comparable findings to that of *S. aureus* interaction with osteoblasts and  
154 adipocytes in regard to the importance of FnBP in bacterial-cell interaction and the  
155 enhancement of bacterial adhesion.

#### 156 **The influence of FBS, Human Serum and plasma fibronectin on bacterial adhesion**

157 The highest bacterial adhesion was seen between MSCs and *S. aureus* WT in the presence of  
158 10% FBS with least bacterial association control as shown Fig. 5 (E) and (F) and this adhesion  
159 greatly reduced with the use of mutant strain  $\Delta$ FnBP in the same conditions, Fig. 5 (G) and



160 (H). The wells with low glucose DMEM without serum show large bacterial number of both  
161 strains, WT and  $\Delta$ FnBP, but with nonspecific cell adhesion (mostly in the background of the  
162 well), Fig. 5 (A) and (C) as confirmed with the bacterial association wells, Fig. 5 (B) and (D).  
163 The use of 40 mg/ml of plasma fibronectin result in great reduction in bacterial adhesion with  
164 the MSCs for WT strain with non-specific adhesion for mutant strain (mostly background  
165 adhesion), Fig. 5 (I) and (K), with high bacterial association control, comparable to the wells  
166 without serum, Fig. 5 (J) and (L). Lastly, the addition of 10% decomplexed human serum  
167 seems to greatly reduce bacterial number in the wells in the presence and absence of cells for  
168 both bacterial strains, Fig. 5 (M),(N),(O),(P), with some bacterial clumps for WT strain as  
169 shown in Fig. (M).

## 170 Association and Invasion Assay for MSCs

171 Fig. 6 demonstrate that 14.66% of *S. aureus* WT CFU that present in the well associated with  
172 MSCs which is statistically higher ( $p$  value  $\leq 0.001$ ) than that for *S. aureus*  $\Delta$ FnBP (0.23%)  
173 and *S. epidermidis* (0.32%), while *S. aureus*  $\Delta$ FnBP p4A, a mutant strain expressing intact  
174 FnBP type A have the highest association at 40.26%, which is statistically higher than WT  
175 strain ( $p$  value  $\leq 0.001$ ). These results confirm the ability of *S. aureus* to associate with MSCs  
176 and that FnBP plays a major role in this association, while the increase in association with the  
177 use  $\Delta$ FnBP p4A confirm the role of FnBP in the association and that Type A FnBP has a higher  
178 significance.

179 After confirming bacterial association with MSCs, extracellular bacteria were killed by  
180 gentamicin in order to prove the intracellular presence of *S. aureus* in the MSCs. The results  
181 stated that for *S. aureus* WT, 1.59% of the associated bacteria invaded MSCs, which is higher,  
182 with a high statistical significance ( $p$  value  $\leq 0.001$ ), than that for *S. aureus*  $\Delta$ FnBP (0.47%)  
183 and *S. epidermidis* (0.55%) as shown in Fig. 14, while  $\Delta$ FnBP p4A show higher invasion  
184 (2.05%) than other strains with slight statistical difference from *S. aureus* WT ( $p$  value  $\leq 0.05$ )  
185 as shown in Fig. 7. These results show the ability of *S. aureus* to invade MSCs and that the  
186 invasion is greatly reduced in the absence of FnBP, while the use of  $\Delta$ FnBP p4A, a mutant  
187 strain expressing intact FnBP type A, greatly enhance the invasion to a degree slightly higher  
188 the wild type strain.

## 189 Association and Invasion Assay for differentiated Osteoblasts

190 Fig. 8 demonstrate that 13.75% of *S. aureus* WT CFU that present in the well associated with  
191 osteoblasts which is statistically higher ( $p$  value  $\leq 0.001$ ) than that for *S. aureus*  $\Delta$ FnBP (1.6%)  
192 and *S. epidermidis* (2.82%), while *S. aureus*  $\Delta$ FnBP p4A, a mutant strain expressing intact  
193 FnBP type A have the highest association at 20.76%, which is statistically higher than WT  
194 strain ( $p$  value  $\leq 0.05$ ). These results confirm the ability of *S. aureus* to associate with  
195 osteoblasts and that FnBP plays a major role in this association, while the increase in  
196 association with the use  $\Delta$ FnBP p4A confirm the role of FnBP in the association and that Type  
197 A FnBP has a higher significance.

198 After confirming bacterial association with osteoblasts, extracellular bacteria were killed by  
199 gentamicin in order to prove the intracellular presence of *S. aureus* in the osteoblasts. The  
200 results stated that for *S. aureus* WT, 1.36% of the associated bacteria invaded osteoblasts,  
201 which is higher, with a high statistical significance ( $p$  value  $\leq 0.001$ ), than that for *S. aureus*  
202  $\Delta$ FnBP (0.18%) and *S. epidermidis* (0.38%) as shown in Fig. 9, while  $\Delta$ FnBP p4A show higher  
203 invasion (1.60%) than other strains, but with no statistical difference from *S. aureus* WT ( $p$   
204 value  $\geq 0.5$ ) as shown in Fig. 9. These results show the ability of *S. aureus* to invade osteoblasts  
205 and that the invasion is greatly reduced in the absence of FnBP, while the use of  $\Delta$ FnBP p4A,

206 a mutant strain expressing intact FnBP type A, greatly enhance the invasion to a degree  
207 comparable to that of the wild type strain.

### 208 **Association and Invasion Assay for differentiated Adipocytes**

209 Fig. 10 demonstrate that 16.87% of *S. aureus* WT CFU that present in the well associated with  
210 Adipocytes which is statistically higher ( $p$  value  $\leq 0.001$ ) than that for *S. aureus*  $\Delta$ FnBP  
211 (1.44%) and *S. epidermidis* (0.57%), while *S. aureus*  $\Delta$ FnBP p4A, a mutant strain expressing  
212 intact FnBP type A have the highest association at 26.08%, which is statistically higher than  
213 WT strain ( $p$  value  $\leq 0.05$ ). These results confirm the ability of *S. aureus* to associate with  
214 Adipocytes and that FnBP plays a major role in this association, while the increase in  
215 association with the use  $\Delta$ FnBP p4A confirm the role of FnBP in the association and that Type  
216 A FnBP has a higher significance.

217 After confirming bacterial association with Adipocytes, extracellular bacteria were killed by  
218 gentamicin in order to prove the intracellular presence of *S. aureus* in the Adipocytes. The  
219 results stated that for *S. aureus* WT, 1.82% of the associated bacteria invaded Adipocytes,  
220 which is higher than that for *S. aureus*  $\Delta$ FnBP (0.57%) and *S. epidermidis* (0.32%) as shown  
221 in Fig. 11 with a statistical significance ( $p$  value  $\leq 0.001$  and  $\leq 0.001$  respectively). The  
222 bacterial invasion increase with the use of bacterial strain  $\Delta$ FnBP p4A at 1.23% , but there was  
223 no statistical significance from the invasion for *S. aureus* WT and  $\Delta$ FnBP ( $p$  value  $> 0.5$ ) as  
224 shown in Fig. 11. These results show the ability of *S. aureus* to invade Adipocytes and that the  
225 invasion is greatly reduced in the absence of FnBP, while the use of  $\Delta$ FnBP p4A, a mutant  
226 strain expressing intact FnBP type A, enhance the invasion in slight degree which may indicate  
227 that invasion of adipocytes by *S. aureus* may require the expression of both types A and B of  
228 the FNBP.

### 229 **Association and Invasion Assay for differentiated Chondrocytes**

230 Fig. 12 demonstrate that 9.36% of *S. aureus* WT CFU that present in the well associated with  
231 Chondrocytes which is statistically higher ( $p$  value  $\leq 0.001$ ) than that for *S. aureus*  $\Delta$ FnBP  
232 (0.83%) and *S. epidermidis* (0.54%), while *S. aureus*  $\Delta$ FnBP p4A, a mutant strain expressing  
233 intact FnBP type A have the highest association at 10.43%, which is statistically higher than  
234 WT strain ( $p$  value  $\leq 0.01$ ). These results confirm the ability of *S. aureus* to associate with  
235 Chondrocytes and that FnBP plays a major role in this association, while the increase in  
236 association with the use  $\Delta$ FnBP p4A confirm the role of FnBP in the association and that Type  
237 A FnBP has a higher significance.

238 After confirming bacterial association with Chondrocytes, extracellular bacteria were killed by  
239 gentamicin in order to prove the intracellular presence of *S. aureus* in the Chondrocytes. The  
240 results stated that for *S. aureus* WT, 2.65% of the associated bacteria invaded Chondrocytes,  
241 which is higher, with a high statistical significance ( $p$  value  $\leq 0.001$ ), than that for *S. aureus*  
242  $\Delta$ FnBP (0.50%) and *S. epidermidis* (0.61%) as shown in Fig. 13, while  $\Delta$ FnBP p4A show  
243 higher invasion (1.98%) than other strains with no statistical difference from *S. aureus* WT ( $p$   
244 value  $>0.5$ ) as shown in Fig. 13. These results show the ability of *S. aureus* to invade  
245 Chondrocytes and that the invasion is greatly reduced in the absence of FnBP, while the use of  
246  $\Delta$ FnBP p4A, a mutant strain expressing intact FnBP type A, enhance the invasion in slight  
247 degree which may indicate that invasion of adipocytes by *S. aureus* may require the expression  
248 of both types A and B of FnBP.

249



## 250 **DISCUSSION**

251 Until now, very few studies have addressed the interaction between MSCs and *S. aureus* (27-  
252 31), but none have studied the interaction of *S. aureus* with bone marrow MSCs and their  
253 differentiated osteoblasts, adipocytes and chondrocytes and the possible mechanism of this  
254 interaction.

255 The first aim for the experiments conducted in this study was to confirm the interaction between  
256 bone marrow MSCs and *S. aureus*, determining the underlying mechanism and ability of  
257 bacteria to invade these cells and survive intracellularly. Then we tried to confirm that this  
258 interaction and subsequent invasion and intracellular survival of bacteria, extends to involve  
259 the cells which are directly differentiated from these MSCs, namely osteoblasts, adipocytes  
260 and chondrocytes.

261 Infection assay was done using MOI 100 as preliminary studies (comparing different MOIs)  
262 showed that at this MOI, there is a uniform distribution of the bacterial strain over the cell  
263 monolayer without causing any bacterial aggregates

264 Our results have shown the ability of *S. aureus* 8325.4 compared to *S. epidermidis* 1457 to  
265 adhere to bone marrow MSCs and differentiated osteoblasts, adipocytes and chondrocytes as  
266 shown in immunofluorescence adhesion assays in Figures 1, 2, 3, and 4. We found that FnBP  
267 plays a major role in this interaction as the adherent bacterial number was greatly reduced when  
268 using *S. aureus*  $\Delta$ FnBP, a mutant lacking the expression of FnBP A/B, and then the percentage  
269 of adherent bacteria increase again, more than the wild type strain, when using bacterial strain  
270  $\Delta$ FnBP p4A that is  $\Delta$ FnBP mutant strain supplemented with plasmid expressing intact FnBP  
271 type A as shown in Figures 1, 2, 3, and 4. The effect of  $\Delta$ FnBP p4A may suggest that FnBP  
272 type A may play a greater role in bacterial adhesion.

273 FBS contains large number of extracellular matrix (ECM) proteins with high percentage of  
274 fibronectin and it has been found that ECM fibronectin plays an important role in the adhesion  
275 of *S. aureus* to several mammalian cell types, including MSCs, by serving as a bridge  
276 facilitating the interaction of bacteria FnBP with cells  $\alpha$ 5 $\beta$ 1 integrin receptors (32). Our results  
277 showed that the presence of 10% FBS in infection medium results in high, specific adhesion  
278 between *S. aureus* WT and MSCs in contrast to the adhesion in the presence of serum free  
279 medium that results in high, non-specific and very low specific adhesion as shown in Fig. 5 (E  
280 ) and (A). On the other hand, Fig.5 (C) and (G) showed greatly reduced bacterial adhesion in  
281 wells with *S. aureus*  $\Delta$ FnBP in the presence of 10% FBS as a result of the absence of FnBP,  
282 while this was not the case in the presence of serum free medium with high, non-specific  
283 adhesion similar to that of the WT strain.

284 We have noticed that there is very low specific bacterial adhesion to MSCs in the presence of  
285 serum free medium, as stated above, and this may prove the release of cellular fibronectin by  
286 MSCs which is used as a bridge for the adhesion process. Also, we have found that the addition  
287 of plasma fibronectin at concentration of 400  $\mu$ g/ml had very little effect on bacterial adhesion  
288 with high association control similar to serum free conditions as shown in Fig. 5 (I), (J), (K)  
289 and (L) of the results.

290 Lastly, the use of 10% de complemented human serum results in very low bacterial number, as  
291 shown in Figure 5 (M), (N), (O) and (P) of the results, in both the adhesion wells and  
292 association control wells with weak immunofluorescence signal, and this may be attributed to  
293 the presence of precipitating anti staphylococcus antibodies in human serum and the possible  
294 role of Staphylococcus protein A (SPA) in inducing immune response.

295 The uptake of *S. aureus* by osteoblasts, and many other cell types necessitates the expression  
296 of FnBPs on the surface of the bacterium (6, 33, 34). These proteins belong to MSCRAMMs  
297 (microbial surface components recognising adhesive matrix molecules), which bind an array  
298 of extracellular matrix proteins such as collagen, elastin, fibrinogen, fibronectin, and bone sialo  
299 protein (35). The invasion of host cells by mutant bacterial strains lacking the two FnBPs,  
300 FnBPA and FnBPB were greatly reduced (33, 34). During the adhesion and invasion processes,  
301 *S. aureus* attaches to fibronectin via FnBPs expressed on their surface, and extracellular matrix  
302 fibronectin functions as a bridging molecule to the integrin  $\alpha 5\beta 1$  that serves as a “phagocytic”  
303 receptor leading to changes in the cytoskeleton of the cell and uptake of bacteria (9, 36).

304 Our results in the quantification association assay (Figures 6, 7 of results) showed that this  
305 specific binding protein plays a significant role in the binding of *S. aureus* to bmMSC. The two  
306 strains expressing this protein (WT, and  $\Delta$ FnPB pA4) were able to adhere to and invade  
307 bmMSCs, while strains missing the binding protein failed to do that.  $\Delta$ FnPB pA4, nevertheless,  
308 exhibited higher adherence followed by higher invasion results as paralleled to WT strain.  
309 Those results were consistent with other studies, as *S. aureus* was able to invade human  
310 Wharton's jelly MSCs and adipose MSCs and that only small number of adherent bacteria were  
311 able to invade MSCs (5, 28).

312 The ability of *S. aureus* to interact with osteoblasts was extensively studied, mostly using cell  
313 lines. In this study we tested the ability of *S. aureus* to adhere and invade differentiated human  
314 osteoblasts (from bmMSCs) and we found that FnBP plays significant role in the interaction  
315 of *S. aureus* with osteoblasts (Fig. 8 and 9). The two strains expressing this protein (WT, and  
316  $\Delta$ FnPB pA4) was able to adhere to and invade osteoblasts, while strains missing the binding  
317 protein failed to do that.  $\Delta$ FnPB pA4, nevertheless, exhibited higher adherence followed by  
318 nearly similar invasion results as paralleled to WT strain. These results are comparable to that  
319 of other studies (33, 37-40).

320 We also found that FnBP plays the same role in the interaction of *S. aureus* with differentiated  
321 adipocytes and chondrocytes (Figures 10, 11, 12 and 13 of results). The two strains expressing  
322 this protein (WT, and  $\Delta$ FnPB pA4) was able to adhere to and invade these cells, while strains  
323 missing the binding protein failed to do that. Although,  $\Delta$ FnPB pA4 does not shown  
324 significantly higher results than WT strain, as was the case with MSCs and to a less degree  
325 osteoblasts. A study by Hanses *et al.*, 2011 confirmed the ability of *S. aureus* to invade  
326 adipocyte-like differentiated 3T3-L1 cells, but without studying the underlying mechanism for  
327 this invasion (41).

## 328 **Conclusion**

329 Our results showed that *S. aureus* is able to interact with MSCs in the form of adhesion and  
330 invasion to the cells, and that this interaction is largely dependent on the expression of FnBP  
331 by *S. aureus*. We also showed that the same mechanism of interaction take place in case of *S.*  
332 *aureus* interaction with osteoblasts, adipocytes and chondrocytes that are directly differentiated  
333 from the same MSCs. Finally, we have found that the presence of 10% FBS in the infection  
334 medium is essential as it helps in achieving the best specific bacterial-cell association with the  
335 least background association.

336

## 337 **ACKNOWLEDGEMENTS:**

338 We are grateful to our sponsor, the HCED and the University of Bristol for their financial support.  
339 Thanks to Dr Andrew Edwards from University of Bath for providing us with the bacterial  
340 strains used in the experiments.

341 **REFERENCES**

342

- 343 1. Uccelli A, Moretta L, Pistoia V. Mesenchymal stem cells in health and disease. *Nat Rev*  
344 *Immunol.* 2008;8(9):726-36.
- 345 2. Augello A, De Bari C. The Regulation of Differentiation in Mesenchymal Stem Cells. *Hum Gene*  
346 *Ther.* 2010;21(10):1226-38.
- 347 3. Javaregowda nK, Yoon JW, Jang G. Roles of Mesenchymal Stem Cells (MSCs) in bacterial  
348 diseases. *Journal of Biomedical Research.* 2013;14(4):184-94.
- 349 4. Liotta F, Angeli R, Cosmi L, Fili L, Manuelli C, Frosali F, et al. Toll-like receptors 3 and 4 are  
350 expressed by human bone marrow-derived mesenchymal stem cells and can inhibit their T-cell  
351 modulatory activity by impairing notch signaling. *Stem Cells.* 2008;26(1):279-89.
- 352 5. Josse J, Velard F, Mechiche Alami S, Brun V, Guillaume C, Kerdjoudj H, et al. Increased  
353 internalization of *Staphylococcus aureus* and cytokine expression in human Wharton's jelly  
354 mesenchymal stem cells. *Bio-Medical Materials and Engineering.* 2014;24(0):27-35.
- 355 6. Garzoni C, Kelley WL. *Staphylococcus aureus*: new evidence for intracellular persistence.  
356 *Trends in microbiology.* 2009;17(2):59-65.
- 357 7. Claro T, Widaa A, O'Seaghda M, Miajlovic H, Foster TJ, O'Brien FJ, et al. *Staphylococcus*  
358 *aureus* Protein A Binds to Osteoblasts and Triggers Signals That Weaken Bone in Osteomyelitis. *Plos*  
359 *One.* 2011;6(4).
- 360 8. Cheung AL, Bayer AS, Zhang G, Gresham H, Xiong YQ. Regulation of virulence determinants in  
361 vitro and in vivo in *Staphylococcus aureus*. *FEMS Immunol Med Microbiol.* 2004;40(1):1-9.
- 362 9. Fowler T, Wann ER, Joh D, Johansson S, Foster TJ, Hook M. Cellular invasion by  
363 *Staphylococcus aureus* involves a fibronectin bridge between the bacterial fibronectin-binding  
364 MSCRAMMs and host cell beta1 integrins. *European journal of cell biology.* 2000;79(10):672-9.
- 365 10. Wann ER, Gurusiddappa S, Hook M. The fibronectin-binding MSCRAMM FnbpA of  
366 *Staphylococcus aureus* is a bifunctional protein that also binds to fibrinogen. *The Journal of*  
367 *biological chemistry.* 2000;275(18):13863-71.
- 368 11. Patti JM, Allen BL, McGavin MJ, Hook M. MSCRAMM-mediated adherence of microorganisms  
369 to host tissues. *Annual review of microbiology.* 1994;48:585-617.
- 370 12. Hauck CR, Ohlsen K. Sticky connections: extracellular matrix protein recognition and integrin-  
371 mediated cellular invasion by *Staphylococcus aureus*. *Curr Opin Microbiol.* 2006;9(1):5-11.
- 372 13. . !!! INVALID CITATION !!!
- 373 14. Yamada KM, Akiyama SK, Hasegawa T, Hasegawa E, Humphries MJ, Kennedy DW, et al.  
374 Recent advances in research on fibronectin and other cell attachment proteins. *J Cell Biochem.*  
375 1985;28(2):79-97.
- 376 15. Charo IF, Nannizzi L, Smith JW, Cheresh DA. The vitronectin receptor alpha v beta 3 binds  
377 fibronectin and acts in concert with alpha 5 beta 1 in promoting cellular attachment and spreading  
378 on fibronectin. *J Cell Biol.* 1990;111(6 Pt 1):2795-800.
- 379 16. Sinha B, Francois PP, Nusse O, Foti M, Hartford OM, Vaudaux P, et al. Fibronectin-binding  
380 protein acts as *Staphylococcus aureus* invasin via fibronectin bridging to integrin alpha5beta1. *Cell*  
381 *Microbiol.* 1999;1(2):101-17.
- 382 17. Ahmed S, Meghji S, Williams RJ, Henderson B, Brock JH, Nair SP. *Staphylococcus aureus*  
383 Fibronectin Binding Proteins Are Essential for Internalization by Osteoblasts but Do Not Account for  
384 Differences in Intracellular Levels of Bacteria. *Infection and Immunity.* 2001;69(5):2872-7.
- 385 18. Arciola CR, Campoccia D, Gamberini S, Baldassarri L, Montanaro L. Prevalence of *cna*, *fnbA*  
386 and *fnbB* adhesin genes among *Staphylococcus aureus* isolates from orthopedic infections  
387 associated to different types of implant. *FEMS Microbiol Lett.* 2005;246(1):81-6.
- 388 19. Kahl BC, Goulian M, van Wamel W, Herrmann M, Simon SM, Kaplan G, et al. *Staphylococcus*  
389 *aureus* RN6390 replicates and induces apoptosis in a pulmonary epithelial cell line. *Infect Immun.*  
390 2000;68(9):5385-92.

- 391 20. Ogawa SK, Yurberg ER, Hatcher VB, Levitt MA, Lowy FD. Bacterial adherence to human  
392 endothelial cells in vitro. *Infect Immun*. 1985;50(1):218-24.
- 393 21. Jevon M, Guo C, Ma B, Mordan N, Nair SP, Harris M, et al. Mechanisms of internalization of  
394 *Staphylococcus aureus* by cultured human osteoblasts. *Infect Immun*. 1999;67(5):2677-81.
- 395 22. Marriott I, Gray DL, Rati DM, Fowler VG, Stryjewski ME, Levin LS, et al. Osteoblasts produce  
396 monocyte chemoattractant protein-1 in a murine model of *Staphylococcus aureus* osteomyelitis and  
397 infected human bone tissue. *Bone*. 2005;37(4):504-12.
- 398 23. Somayaji SN, Ritchie S, Sahraei M, Marriott I, Hudson MC. *Staphylococcus aureus* Induces  
399 Expression of Receptor Activator of NF- B Ligand and Prostaglandin E2 in Infected Murine  
400 Osteoblasts. *Infection and Immunity*. 2008;76(11):5120-6.
- 401 24. Agerer F, Lux S, Michel A, Rohde M, Ohlsen K, Hauck CR. Cellular invasion by *Staphylococcus*  
402 *aureus* reveals a functional link between focal adhesion kinase and cortactin in integrin-mediated  
403 internalisation. *J Cell Sci*. 2005;118(Pt 10):2189-200.
- 404 25. Wang B, Yurecko RS, Dedhar S, Cleary PP. Integrin-linked kinase is an essential link between  
405 integrins and uptake of bacterial pathogens by epithelial cells. *Cell Microbiol*. 2006;8(2):257-66.
- 406 26. Mosher DF. Plasma fibronectin concentration: a risk factor for arterial thrombosis?  
407 *Arteriosclerosis, thrombosis, and vascular biology*. 2006;26(6):1193-5.
- 408 27. Rahyussalim, Andriansjah, Kusnadi Y, Ismail H, Lubis A, Kurniawati T, et al. Effect of  
409 *Staphylococcus aureus* and *Staphylococcus epidermidis* debris and supernatant on bone marrow  
410 stromal cells growth. *Acta Med Indones*. 2012;44(4):304-9.
- 411 28. Fiedler T, Salamon A, Adam S, Herzmann N, Taubenheim J, Peters K. Impact of bacteria and  
412 bacterial components on osteogenic and adipogenic differentiation of adipose-derived mesenchymal  
413 stem cells. *Experimental cell research*. 2013;319(18):2883-92.
- 414 29. Yuan Y, Lin S, Guo N, Zhao C, Shen S, Bu X, et al. Marrow mesenchymal stromal cells reduce  
415 methicillin-resistant *Staphylococcus aureus* infection in rat models. *Cytotherapy*. 2014;16(1):56-63.
- 416 30. Kim H, Darwish I, Monroy MF, Prockop DJ, Liles WC, Kain KC. Mesenchymal stromal (stem)  
417 cells suppress pro-inflammatory cytokine production but fail to improve survival in experimental  
418 staphylococcal toxic shock syndrome. *BMC immunology*. 2014;15:1.
- 419 31. Pietila M, Lahteenmaki K, Lehtonen S, Leskela HV, Narhi M, Lonroth M, et al. Monitoring  
420 mitochondrial inner membrane potential for detecting early changes in viability of bacterium-  
421 infected human bone marrow-derived mesenchymal stem cells. *Stem Cell Res Ther*. 2012;3(6):53.
- 422 32. Edwards AM, Potter U, Meenan NAG, Potts JR, Massey RC. *Staphylococcus aureus*  
423 Keratinocyte Invasion Is Dependent upon Multiple High-Affinity Fibronectin-Binding Repeats within  
424 FnBPA. *Plos One*. 2011;6(4).
- 425 33. Ahmed S, Meghji S, Williams RJ, Henderson B, Brock JH, Nair SP. *Staphylococcus aureus*  
426 fibronectin binding proteins are essential for internalization by osteoblasts but do not account for  
427 differences in intracellular levels of bacteria. *Infect Immun*. 2001;69(5):2872-7.
- 428 34. Sinha B, ois PPF, ûe ON, Foti M, Hartford OM, Vaudaux P, et al. fibronectin-binding protein act  
429 as *staphylococcus aureus* invasion via fibronectin bridging to integrin  $\alpha_5\beta_1$ . *cellular microbiology*.  
430 1999;1(2):101-17.
- 431 35. Hauck CR, Ohlsen K. Sticky connections: extracellular matrix protein recognition and integrin-  
432 mediated cellular invasion by *Staphylococcus aureus*. *Current opinion in microbiology*. 2006;9(1):5-  
433 11.
- 434 36. Sinha B, Fraunholz M. *Staphylococcus aureus* host cell invasion and post-invasion events.  
435 *International Journal of Medical Microbiology*. 2010;300(2-3):170-5.
- 436 37. Alexander EH, Rivera FA, Marriott I, Anguita J, Bost KL, Hudson MC. *Staphylococcus aureus* -  
437 induced tumor necrosis factor - related apoptosis - inducing ligand expression mediates apoptosis  
438 and caspase-8 activation in infected osteoblasts. *BMC Microbiol*. 2003;3:5.
- 439 38. Ellington JK, Reilly SS, Ramp WK, Smeltzer MS, Kellam JF, Hudson MC. Mechanisms of  
440 *Staphylococcus aureus* invasion of cultured osteoblasts. *Microb Pathog*. 1999;26(6):317-23.

- 441 39. Ellington JK, Harris M, Webb L, Smith B, Smith T, Tan K, et al. Intracellular *Staphylococcus*  
442 *aureus*. A mechanism for the indolence of osteomyelitis. *The Journal of bone and joint surgery*  
443 *British volume*. 2003;85(6):918-21.
- 444 40. Tucker KA, Reilly SS, Leslie CS, Hudson MC. Intracellular *Staphylococcus aureus* induces  
445 apoptosis in mouse osteoblasts. *FEMS Microbiol Lett*. 2000;186(2):151-6.
- 446 41. Hanses F, Kopp A, Bala M, Buechler C, Falk W, Salzberger B, et al. Intracellular survival of  
447 *Staphylococcus aureus* in adipocyte-like differentiated 3T3-L1 cells is glucose dependent and alters  
448 cytokine, chemokine, and adipokine secretion. *Endocrinology*. 2011;152(11):4148-57.

449

450

451

452

453

454

455

456

457

458

459

460

461

462

463

464

465

466

467

468

469

470



## 471 Figures Legend

| Figure   | Legend                                                                                                                                                                                                                                                                                                                                                                                                                                                                                                                                                                                                                                                                                                                                                                                                                                                                                                                                                                                                                                                                                                                                                                                                                                                                                                                                                                                                                                                                                                                                                                                                                                                                                                                                                                                                                                                                                                    |
|----------|-----------------------------------------------------------------------------------------------------------------------------------------------------------------------------------------------------------------------------------------------------------------------------------------------------------------------------------------------------------------------------------------------------------------------------------------------------------------------------------------------------------------------------------------------------------------------------------------------------------------------------------------------------------------------------------------------------------------------------------------------------------------------------------------------------------------------------------------------------------------------------------------------------------------------------------------------------------------------------------------------------------------------------------------------------------------------------------------------------------------------------------------------------------------------------------------------------------------------------------------------------------------------------------------------------------------------------------------------------------------------------------------------------------------------------------------------------------------------------------------------------------------------------------------------------------------------------------------------------------------------------------------------------------------------------------------------------------------------------------------------------------------------------------------------------------------------------------------------------------------------------------------------------------|
| Figure 1 | Immunofluorescence adhesion of four bacterial strains to MSCs. The cells were cultured in 96 well plates and then confluent cells were infected with bacterial strains for 90 min. The experiments were repeated with cells from 3 patients and done in technical duplicates. (A) MSCs with <i>S. aureus</i> WT strain. (B) MSCs with <i>S. aureus</i> $\Delta$ FnBP A/B Strain. (C) MSCs with <i>S. aureus</i> pFnBPA4 Strain. (D) MSCs with <i>S. epidermidis</i> . Blue areas represent MSCs nucleus stained with DAPI, red dots represent <i>S. aureus</i> bound to rabbit anti <i>S. aureus</i> . Green areas indicate MSCs bound to mouse anti-vimentin. The primary antibodies were detected with secondary antibodies conjugated to the fluorophore.                                                                                                                                                                                                                                                                                                                                                                                                                                                                                                                                                                                                                                                                                                                                                                                                                                                                                                                                                                                                                                                                                                                                              |
| Figure 2 | Immunofluorescence adhesion of four bacterial strains to differentiated osteoblasts. After three weeks of MSCs differentiation to osteoblasts in 96 well plate, the differentiated cells were infected with bacterial strains for 90 min. The experiments were repeated with cells from 3 patients and done in technical duplicates. (A) Osteoblasts with <i>S. aureus</i> WT strain. (B) Osteoblasts with <i>S. aureus</i> $\Delta$ FnBP A/B Strain. (C) Osteoblasts with <i>S. aureus</i> pFnBPA4 Strain. (D) Osteoblasts with <i>S. epidermidis</i> . Blue areas represent osteoblasts nucleus stained with DAPI, green dots represent <i>S. aureus</i> bound to rabbit anti <i>S. aureus</i> Ab. Red areas indicate osteoblasts bound to mouse anti-osteocalcin Ab. The primary antibodies were detected with secondary antibodies conjugated to the fluorophore.                                                                                                                                                                                                                                                                                                                                                                                                                                                                                                                                                                                                                                                                                                                                                                                                                                                                                                                                                                                                                                     |
| Figure 3 | Immunofluorescence adhesion of four bacterial strains to differentiated adipocytes. After three weeks of MSCs differentiation to adipocytes in 96 well plate, the differentiated cells were infected with bacterial strains for 90 min. The experiments were repeated with cells from 3 patients and done in technical duplicates. (A) Adipocytes with <i>S. aureus</i> WT strain. (B) Adipocytes with <i>S. aureus</i> $\Delta$ FnBP A/B strain. (C) Adipocytes with <i>S. aureus</i> pFnBPA4 Strain. (D) Adipocytes with <i>S. epidermidis</i> . Blue areas represent adipocytes nucleus stained with DAPI, green-yellow dots represent <i>S. aureus</i> bound to rabbit anti <i>S. aureus</i> Ab. Red areas indicate adipocytes bound to goat anti-fatty acid binding protein Ab. The primary antibodies were detected with secondary antibodies conjugated to the fluorophore.                                                                                                                                                                                                                                                                                                                                                                                                                                                                                                                                                                                                                                                                                                                                                                                                                                                                                                                                                                                                                        |
| Figure 4 | Immunofluorescence adhesion of four bacterial strains to differentiated chondrocytes. After three weeks of MSCs differentiation to chondrocytes in 96 well plate, the differentiated cells were infected with bacterial strains for 90 min. The experiments were repeated with cells from 3 patients and done in technical duplicates. (A) Chondrocytes with <i>S. aureus</i> WT strain. (B) Chondrocytes with <i>S. aureus</i> $\Delta$ FnBP A/B Strain. (C) Chondrocytes with <i>S. aureus</i> pFnBPA4 Strain. (D) Chondrocytes with <i>S. epidermidis</i> . Blue areas represent chondrocytes nucleus stained with DAPI, green dots represent <i>S. aureus</i> bound to rabbit Anti <i>S. aureus</i> Ab. Red areas indicate chondrocytes bound to goat anti-aggrecan Ab. The primary antibodies were detected with secondary antibodies conjugated to the fluorophore.                                                                                                                                                                                                                                                                                                                                                                                                                                                                                                                                                                                                                                                                                                                                                                                                                                                                                                                                                                                                                                 |
| Figure 5 | Effect of FBS, Fn, and HuSer on bacterial adhesion to MSCs. Infection assay was done in 96 well plate using 2 bacterial strains with MSCs in 4 different conditions for 90 min, then washing and immunohistochemical staining was done, these are representative images from triplet for three patients. (A) MSCs with <i>S. aureus</i> WT in low glucose DMEM without serum (B) <i>S. aureus</i> WT association control in low glucose DMEM without serum (C) MSCs with <i>S. aureus</i> $\Delta$ FnBP in low glucose DMEM without serum (D) <i>S. aureus</i> $\Delta$ FnBP association control in low glucose DMEM without serum (E) MSCs with <i>S. aureus</i> WT in low glucose DMEM + 10% FBS (F) <i>S. aureus</i> WT association control in low glucose DMEM + 10% FBS (G) MSCs with <i>S. aureus</i> $\Delta$ FnBP in low glucose DMEM +10% FBS (H) <i>S. aureus</i> $\Delta$ FnBP association control in low glucose DMEM +10%FBS (I) MSCs with <i>S. aureus</i> WT in low glucose DMEM + 400 $\mu$ g/ml Fn (J) <i>S. aureus</i> WT association control in low glucose DMEM + 400 $\mu$ g/ml Fn (K) MSCs with <i>S. aureus</i> $\Delta$ FnBP in low glucose DMEM + 400 $\mu$ g/ml Fn (L) <i>S. aureus</i> $\Delta$ FnBP association control in low glucose DMEM + 400 $\mu$ g/ml Fn (M) MSCs with <i>S. aureus</i> WT in low glucose DMEM + 10% HuSer (N) <i>S. aureus</i> WT association control in low glucose DMEM + 10% HuSer (O) MSCs with <i>S. aureus</i> $\Delta$ FnBP in low glucose DMEM + 10% HuSer (P) <i>S. aureus</i> $\Delta$ FnBP association control in low glucose DMEM + 10%HuSer. Blue areas represent MSCs nucleus stained with DAPI, red dots represent <i>S. aureus</i> bound to rabbit anti <i>S. aureus</i> Ab. Green areas indicate MSCs bound to mouse anti-vimentin Ab. The primary antibodies were detected with secondary antibodies conjugated to the fluorophore. |



|           |                                                                                                                                                                                                                                                                                                                                                                                                                                                                                                                                                                                                                                                                                                                        |
|-----------|------------------------------------------------------------------------------------------------------------------------------------------------------------------------------------------------------------------------------------------------------------------------------------------------------------------------------------------------------------------------------------------------------------------------------------------------------------------------------------------------------------------------------------------------------------------------------------------------------------------------------------------------------------------------------------------------------------------------|
| Figure 6  | Association assay for MSCs with 4 bacterial strains. Confluent MSCs in 96 well plate were infected with 4 bacterial strains at MOI 100 for 3 hr, then washing and serial dilution was done followed by inoculation of dilution factors in MHA plates and CFU count done after 24 hr. The data are from three independent experiments of three patients. WT=wild type, DFNBp=mutant lacking the expression of fibronectin binding protein A/B, DFNBp p4A=mutant supplemented with plasmid expressing intact fibronectin binding protein type A.<br>*** = P < 0.001, ns = P > 0.05                                                                                                                                       |
| Figure 7  | Invasion assay for MSCs with 4 bacterial strains. Confluent MSCs in 96 well plate were infected with 4 bacterial strains at MOI 100 for 3 hr, then washing and the plate incubated with gentamycin for 90 min to kill extracellular bacteria, then washing and serial dilution was done followed by inoculation of dilution factors in MHA plates and CFU count done after 24 hr. The data are from three independent experiments of three patients. WT=wild type, DFNBp=mutant lacking the expression of fibronectin binding protein A/B, DFNBp p4A=mutant supplemented with plasmid expressing intact fibronectin binding protein type A.<br>*** = P < 0.001, * = P < 0.05                                           |
| Figure 8  | Association assay for osteoblasts with 4 bacterial strains. Confluent osteoblasts in 96 well plate were infected with 4 bacterial strains at MOI 100 for 3 hr, then washing and serial dilution was done followed by inoculation of dilution factors in MHA plates and CFU count done after 24 hr. The data are from three independent experiments of three patients. WT=wild type, DFNBp=mutant lacking the expression of fibronectin binding protein A/B, DFNBp p4A=mutant supplemented with plasmid expressing intact fibronectin binding protein type A.<br>*** = P < 0.001, * = P < 0.05, ns = P > 0.05                                                                                                           |
| Figure 9  | Invasion assay for Osteoblasts with 4 bacterial strains. Confluent Osteoblasts in 96 well plate were infected with 4 bacterial strains at MOI 100 for 3 hr, then washing and the plate incubated with gentamycin for 90 min to kill extracellular bacteria, then washing and serial dilution was done followed by inoculation of dilution factors in MHA plates and CFU count done after 24 hr. The data are from three independent experiments of three patients. WT=wild type, DFNBp=mutant lacking the expression of fibronectin binding protein A/B, DFNBp p4A=mutant supplemented with plasmid expressing intact fibronectin binding protein type A.<br>*** = P < 0.001, ** = P < 0.01, ns = P > 0.05             |
| Figure 10 | Association assay for adipocytes with 4 bacterial strains. Confluent adipocytes in 96 well plate were infected with 4 bacterial strains at MOI 100 for 3 hr, then washing and serial dilution was done followed by inoculation of dilution factors in MHA plates and CFU count done after 24 hr. The data are from three independent experiments of three patients. WT=wild type, DFNBp=mutant lacking the expression of fibronectin binding protein A/B, DFNBp p4A=mutant supplemented with plasmid expressing intact fibronectin binding protein type A.<br>*** = P < 0.001, ** = P < 0.01, * = P < 0.05, ns = P > 0.05                                                                                              |
| Figure 11 | Invasion assay for Adipocytes with 4 bacterial strains. Confluent Adipocytes in 96 well plate were infected with 4 bacterial strains at MOI 100 for 3 hr, then washing and the plate incubated with gentamycin for 90 min to kill extracellular bacteria, then washing and serial dilution was done followed by inoculation of dilution factors in MHA plates and CFU count done after 24 hr. The data are from three independent experiments of three patients. WT=wild type, DFNBp=mutant lacking the expression of fibronectin binding protein A/B, DFNBp p4A=mutant supplemented with plasmid expressing intact fibronectin binding protein type A.<br>*** = P < 0.001, ** = P < 0.01, * = P < 0.05, ns = P > 0.05 |
| Figure 12 | Association assay for chondrocytes with 4 bacterial strains. Confluent chondrocytes in 96 well plate were infected with 4 bacterial strains at MOI 100 for 3 hr, then washing and serial dilution was done followed by inoculation of dilution factors in MHA plates and CFU count done after 24 hr. The data are from three independent experiments of three patients. WT=wild type, DFNBp=mutant lacking the expression of fibronectin binding protein A/B, DFNBp p4A=mutant supplemented with plasmid expressing intact fibronectin binding protein type A.<br>*** = P < 0.001, ** = P < 0.01, ns = P > 0.05                                                                                                        |
| Figure 13 | Invasion assay for Chondrocytes with 4 bacterial strains. Confluent chondrocytes in 96 well plate were infected with 4 bacterial strains at MOI 100 for 3 hr, then washing and the plate incubated with gentamycin for 90 min to kill extracellular bacteria, then washing and serial dilution was done followed by inoculation of dilution factors in MHA plates and CFU count done after 24 hr. The data are from three independent experiments of three patients. WT=wild type, DFNBp=mutant lacking the expression of fibronectin binding protein A/B, DFNBp p4A=mutant supplemented with plasmid expressing intact fibronectin binding protein type A.<br>*** = P < 0.001, ** = P < 0.01, ns = P > 0.05           |

**Figure 1**

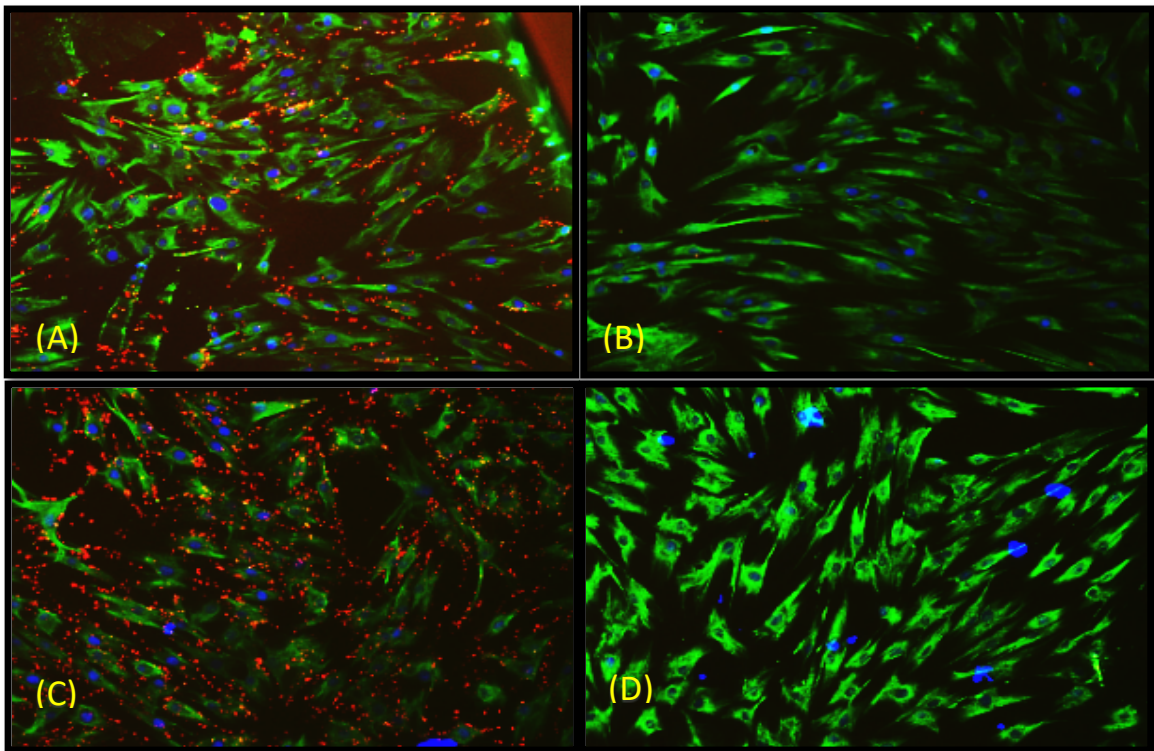

**Figure 2**

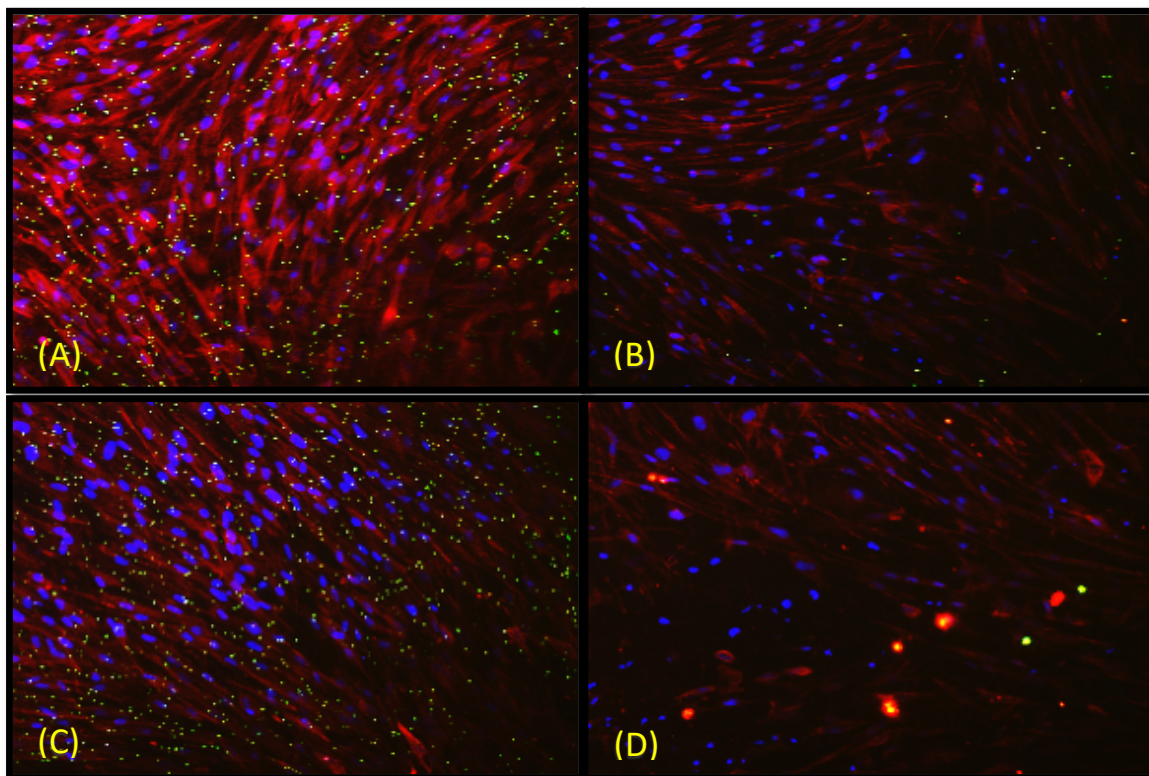

**Figure 3**

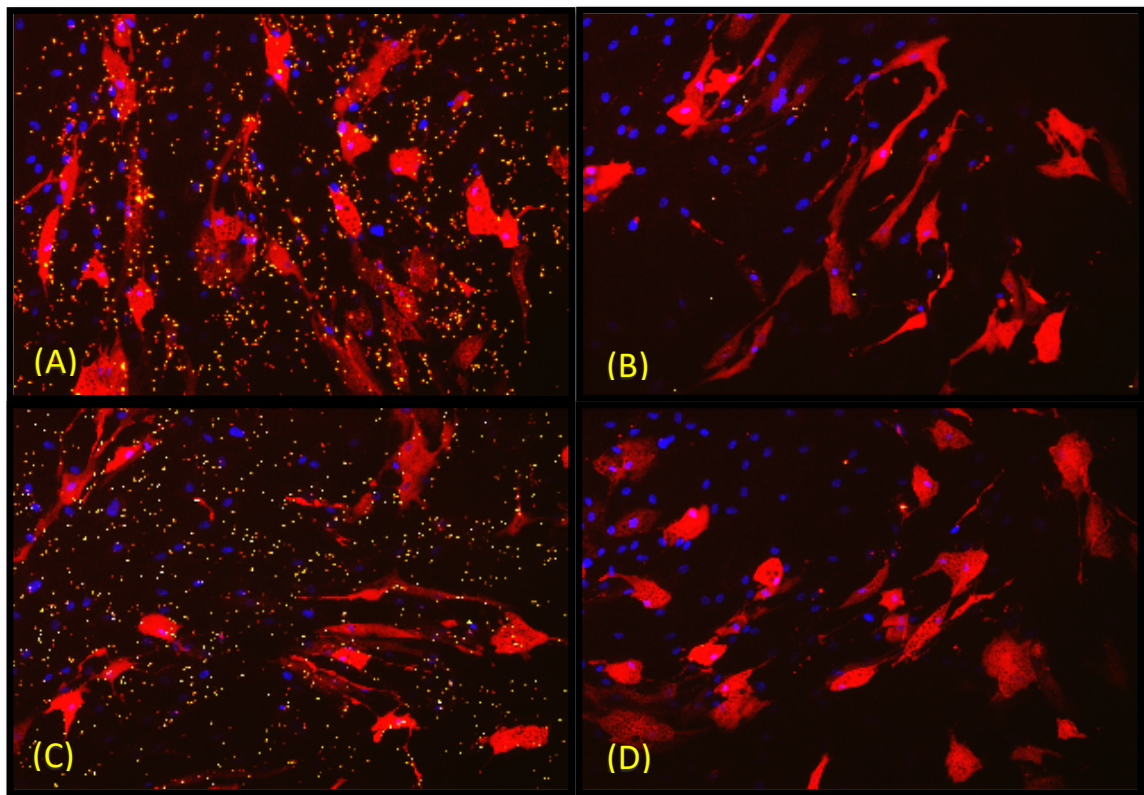



**Figure 4**

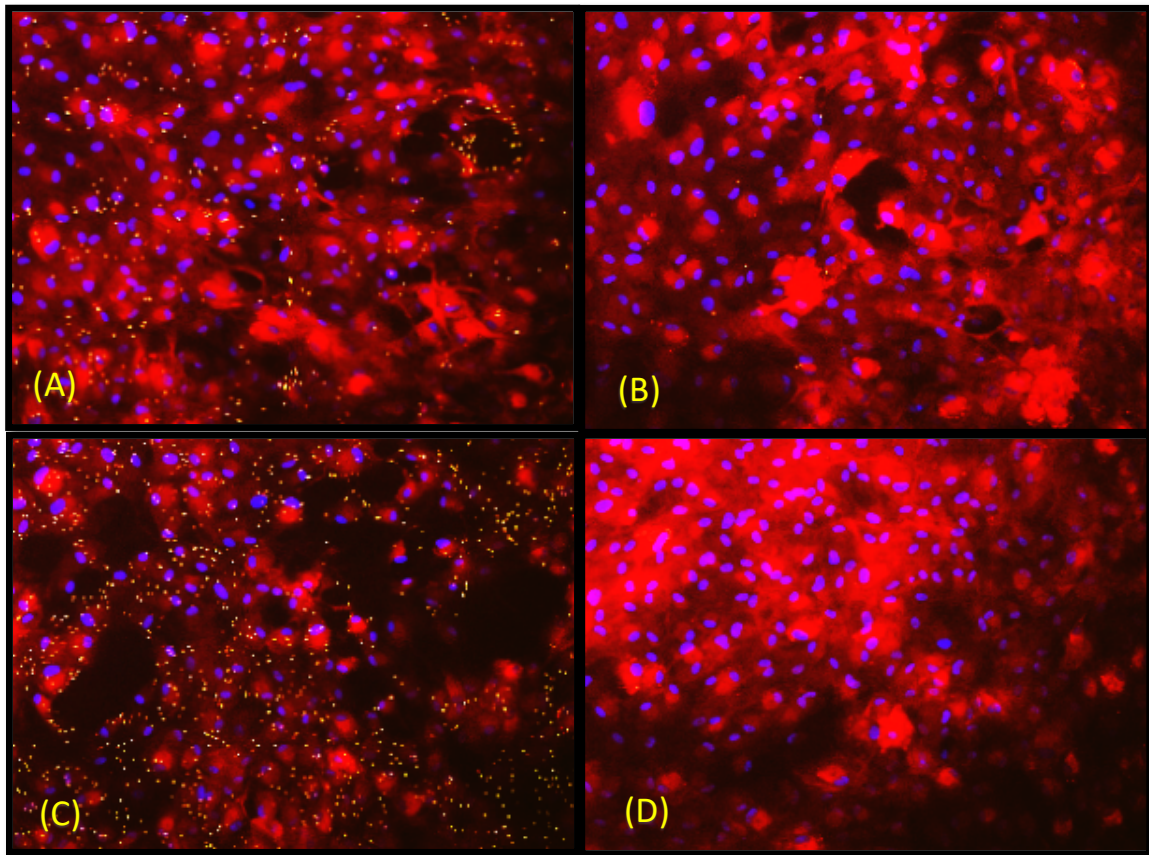

**Figure 5**

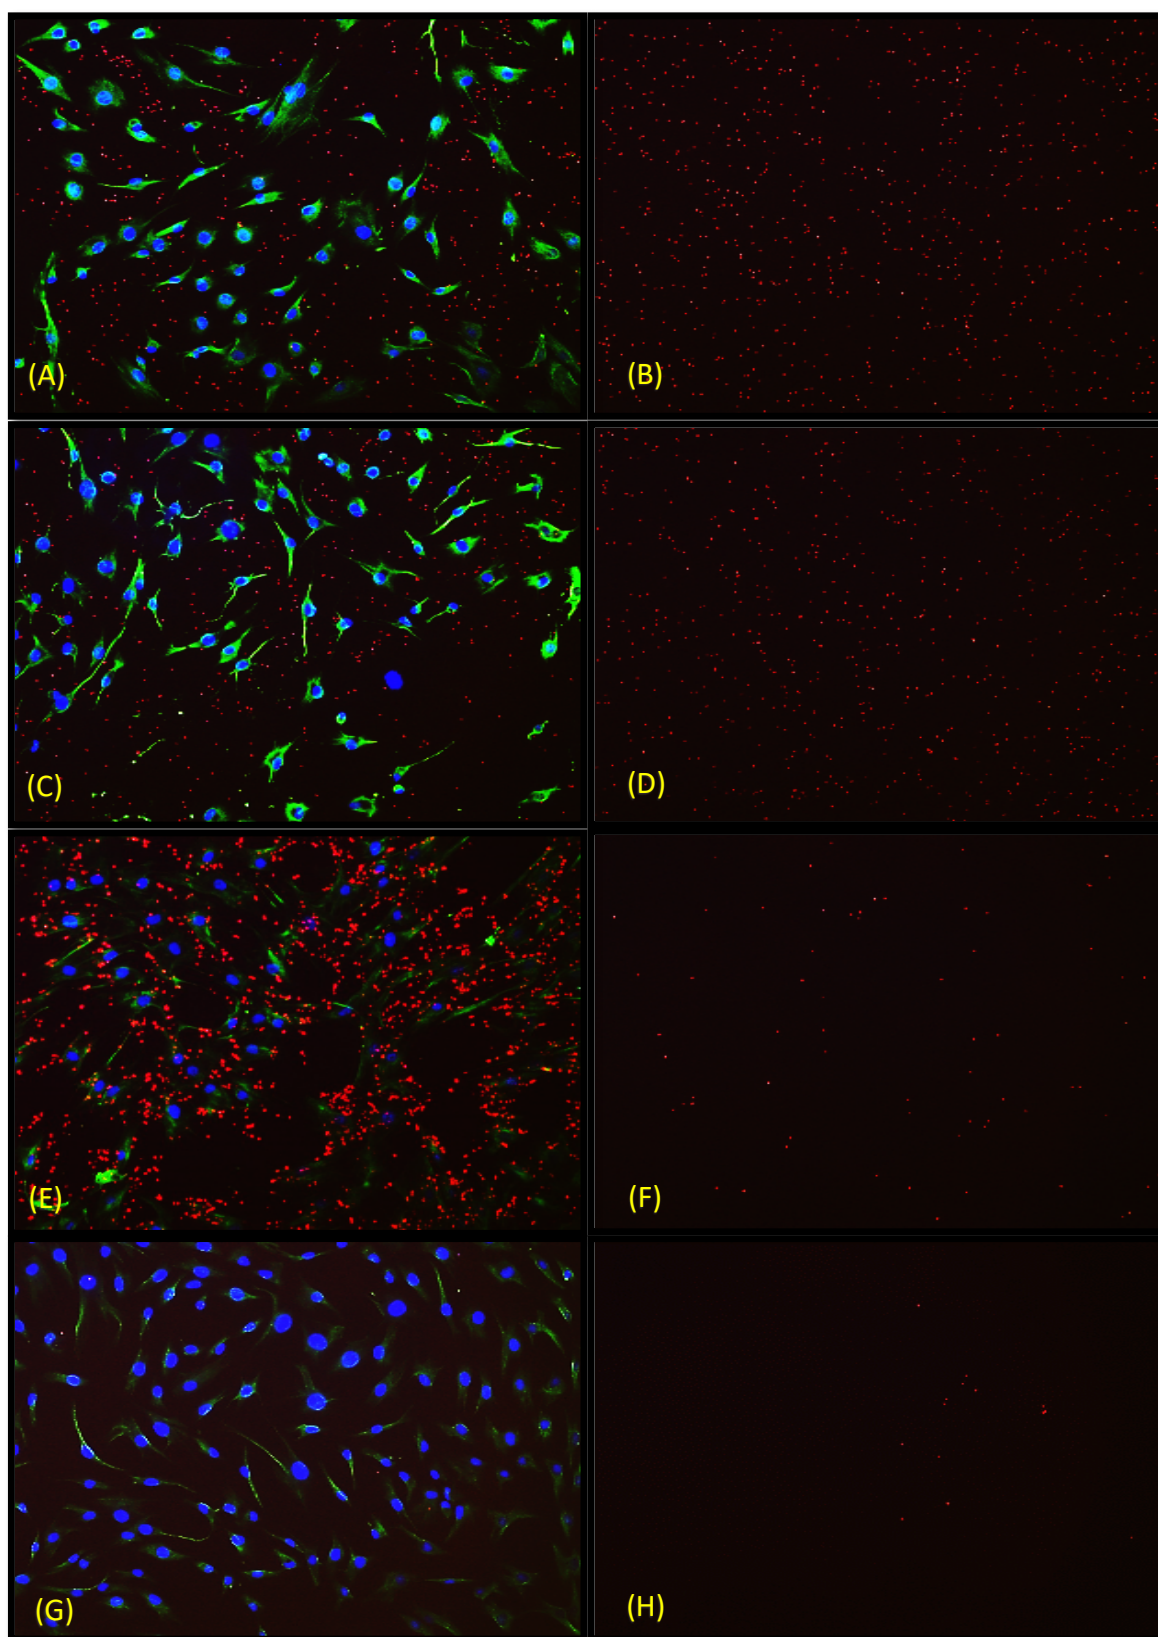



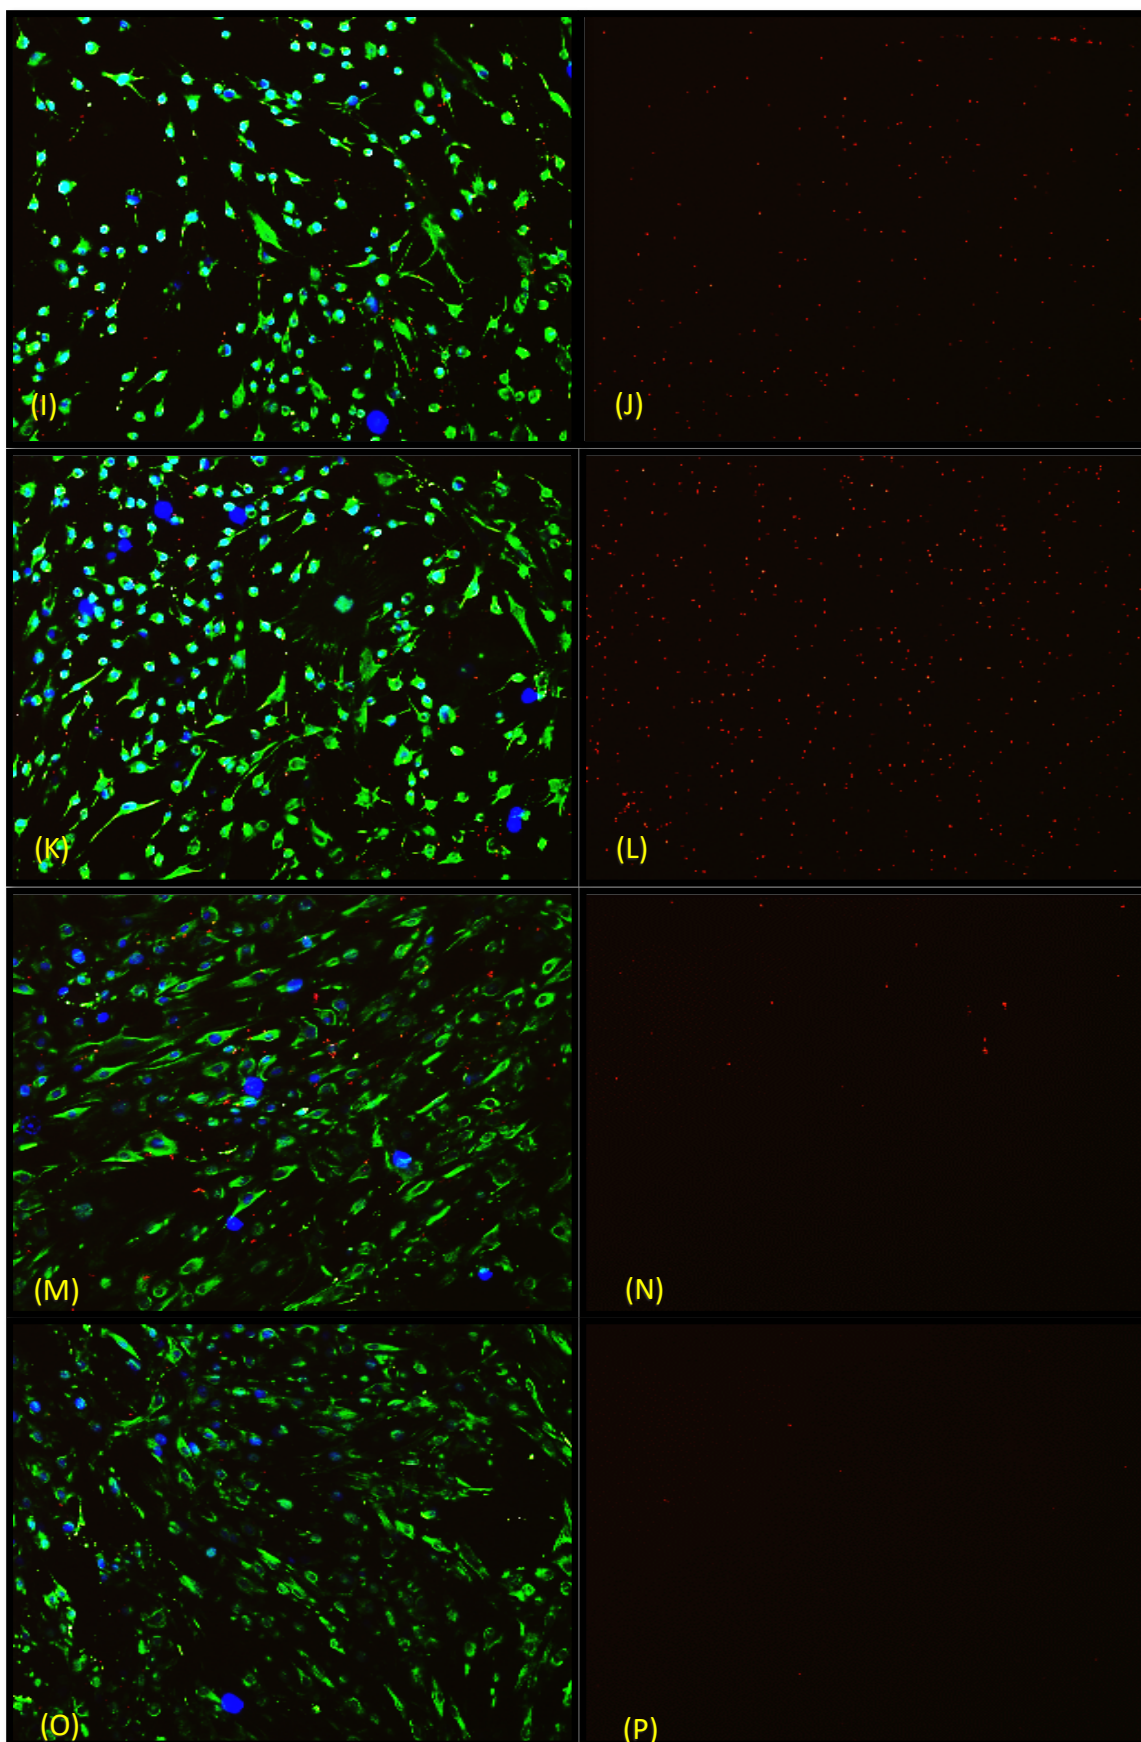

**Figure 6**

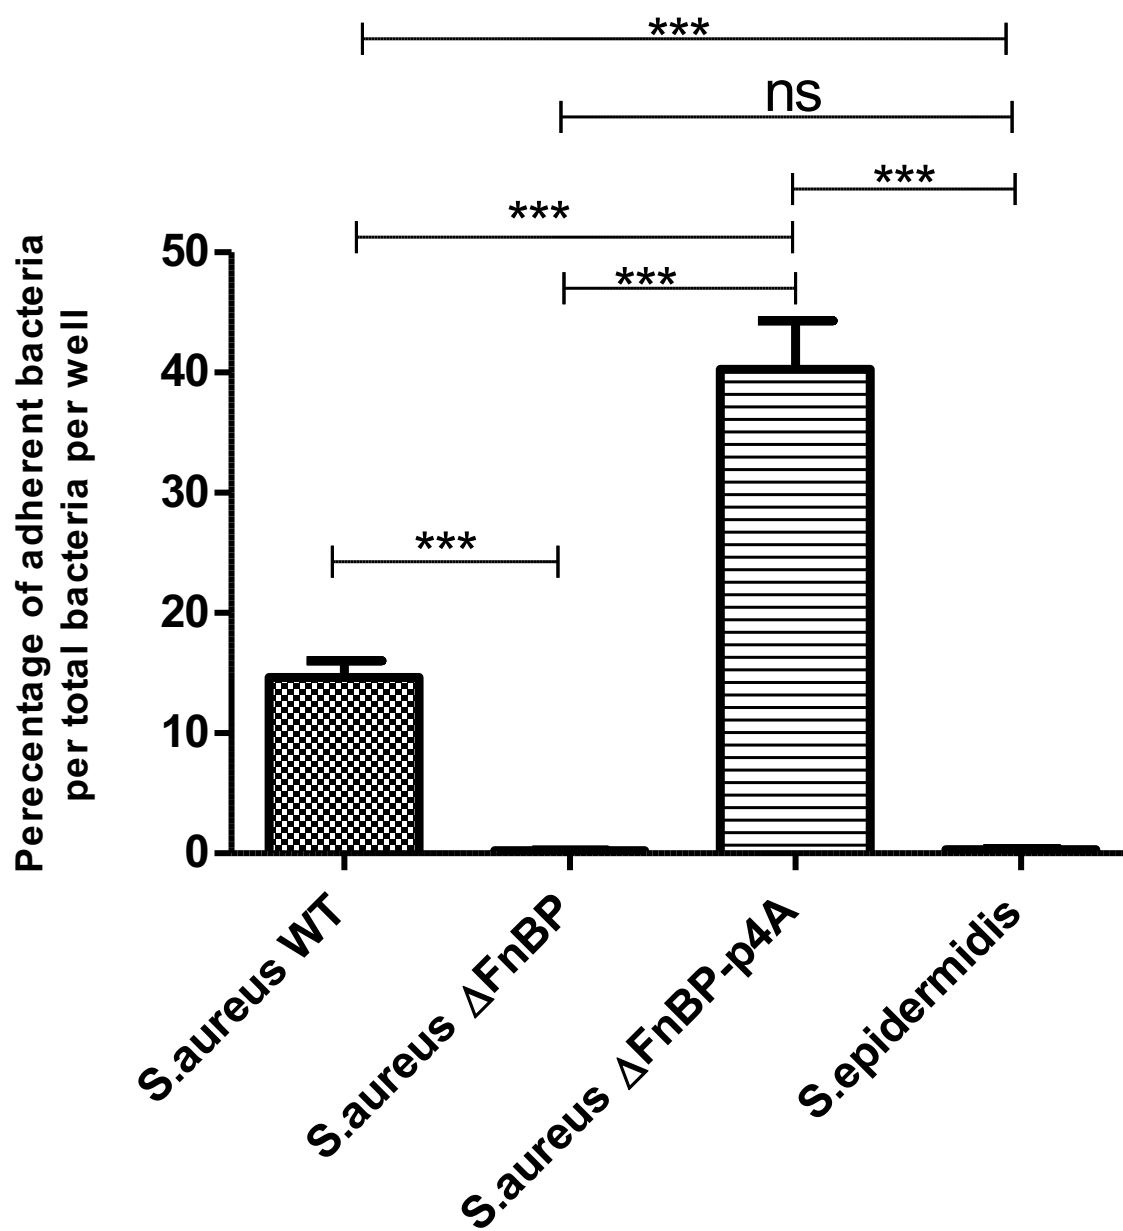

**Figure 7**

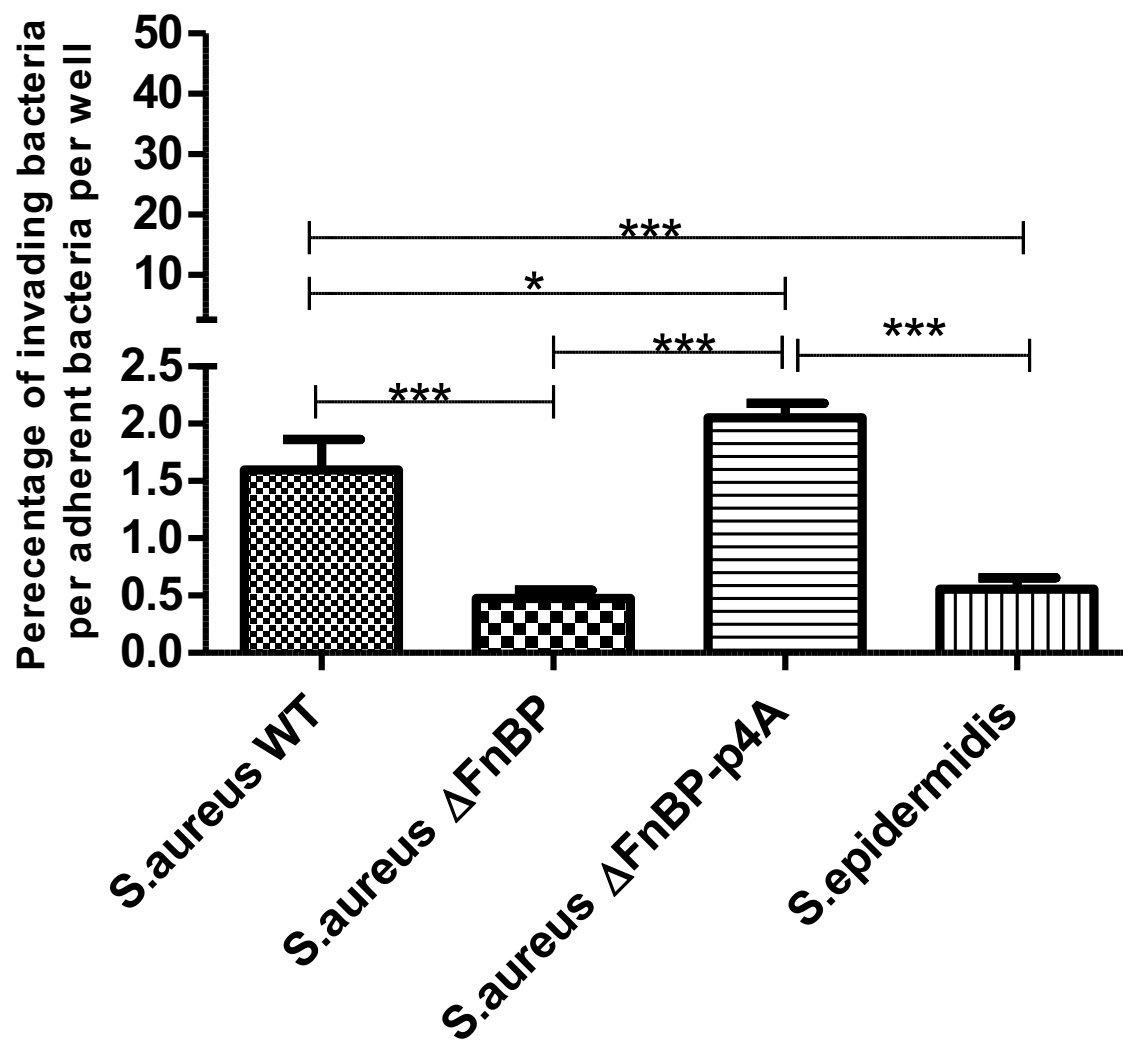

**Figure 8**

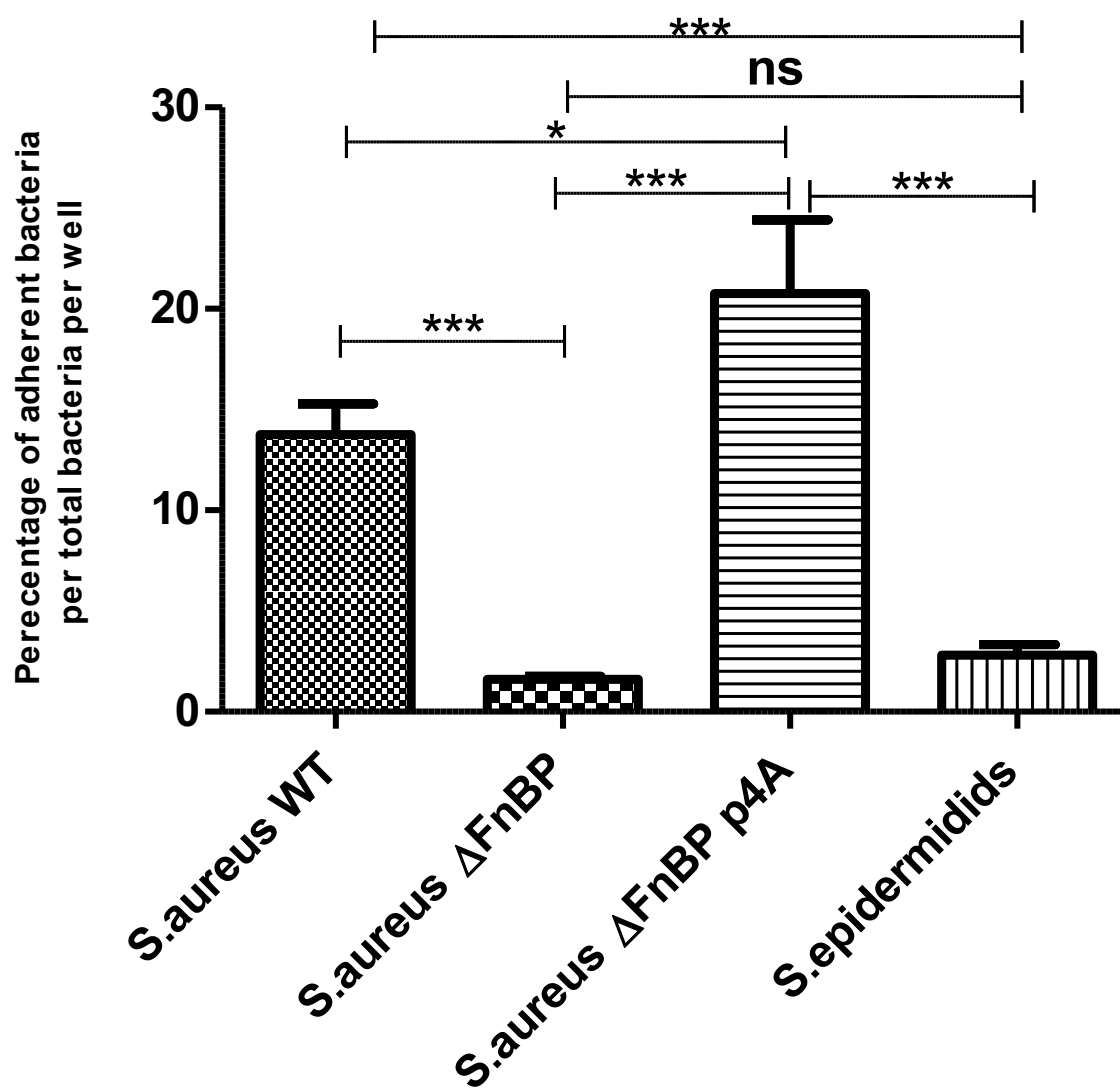

**Figure 9**

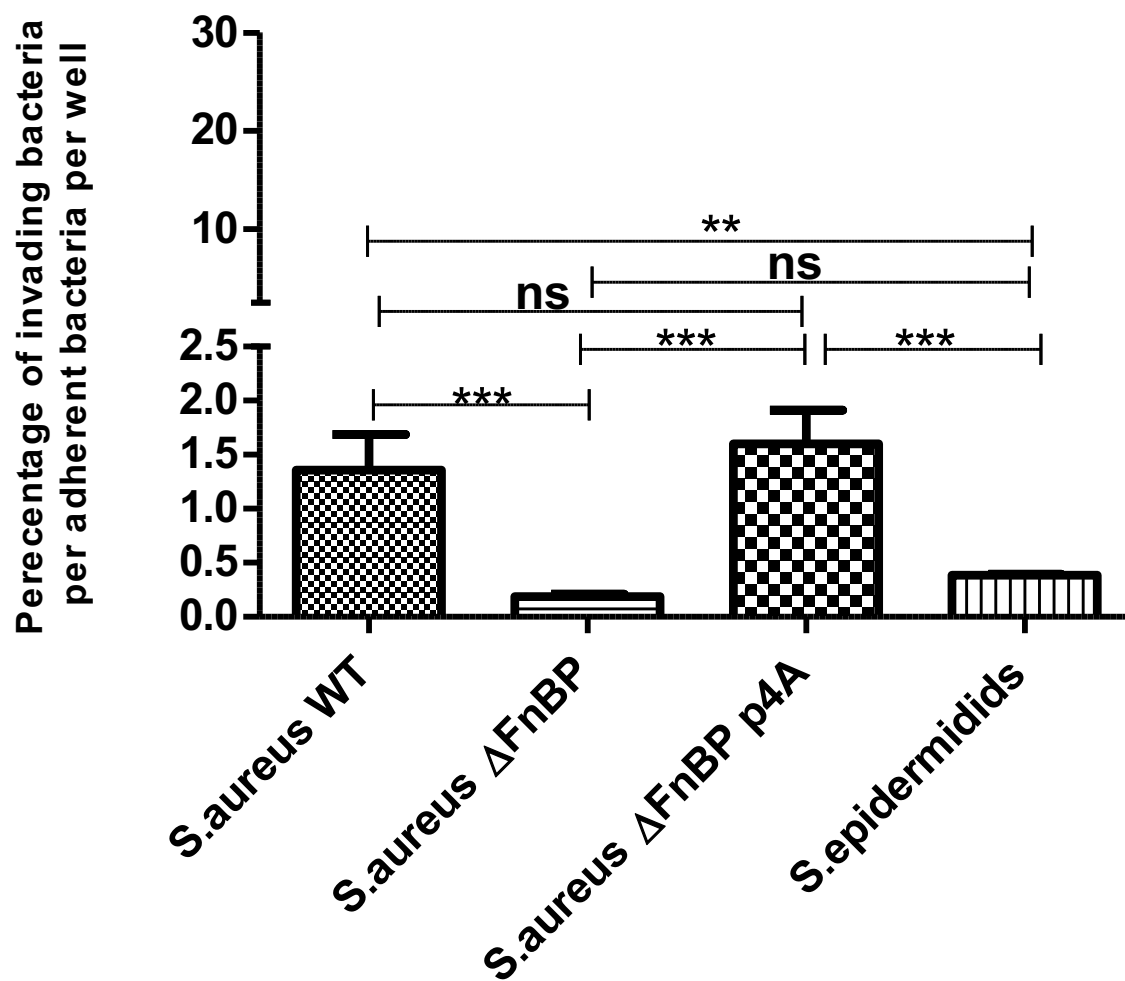

**Figure 10**

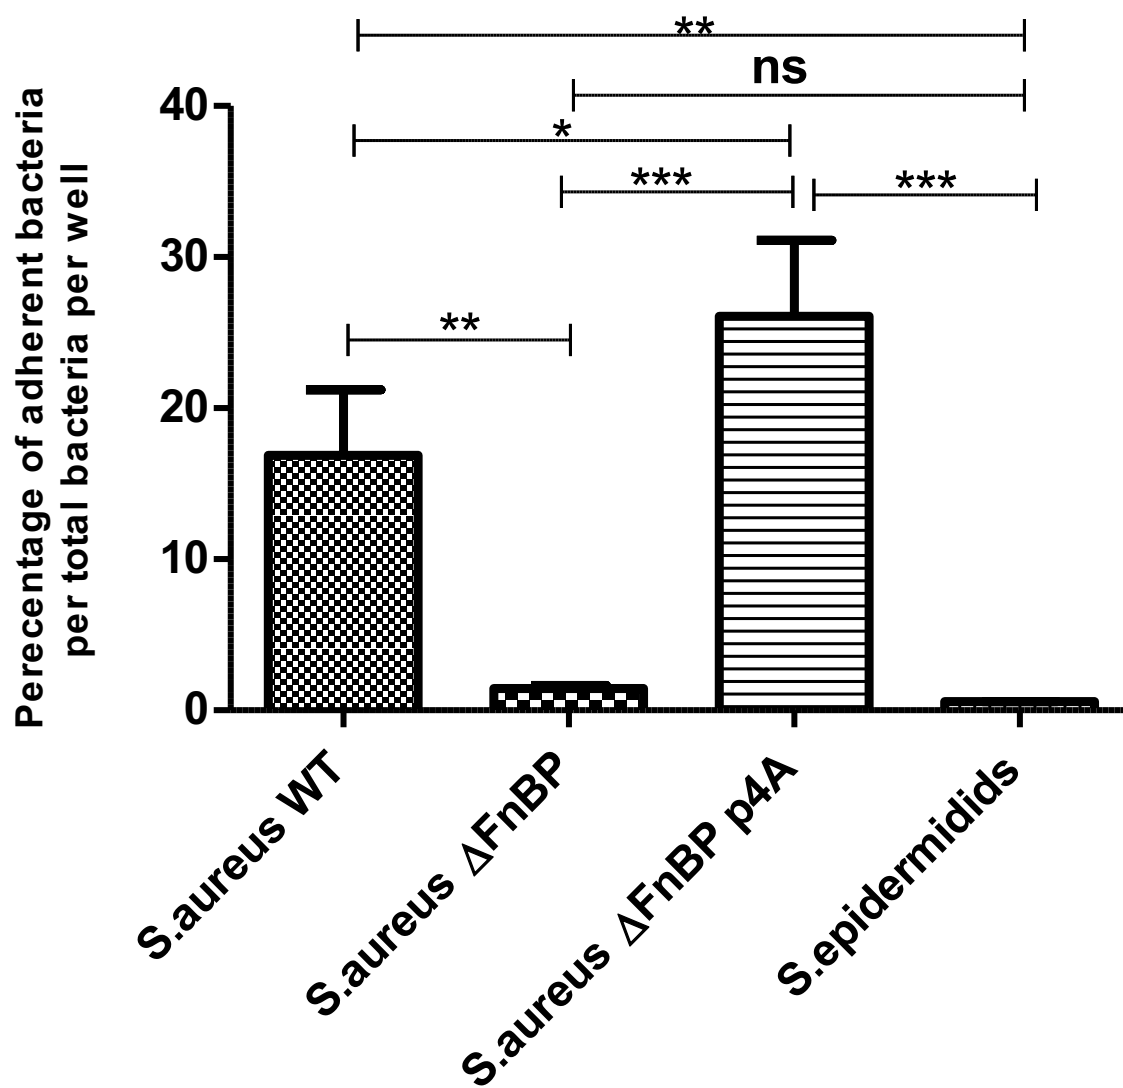



**Figure 11**

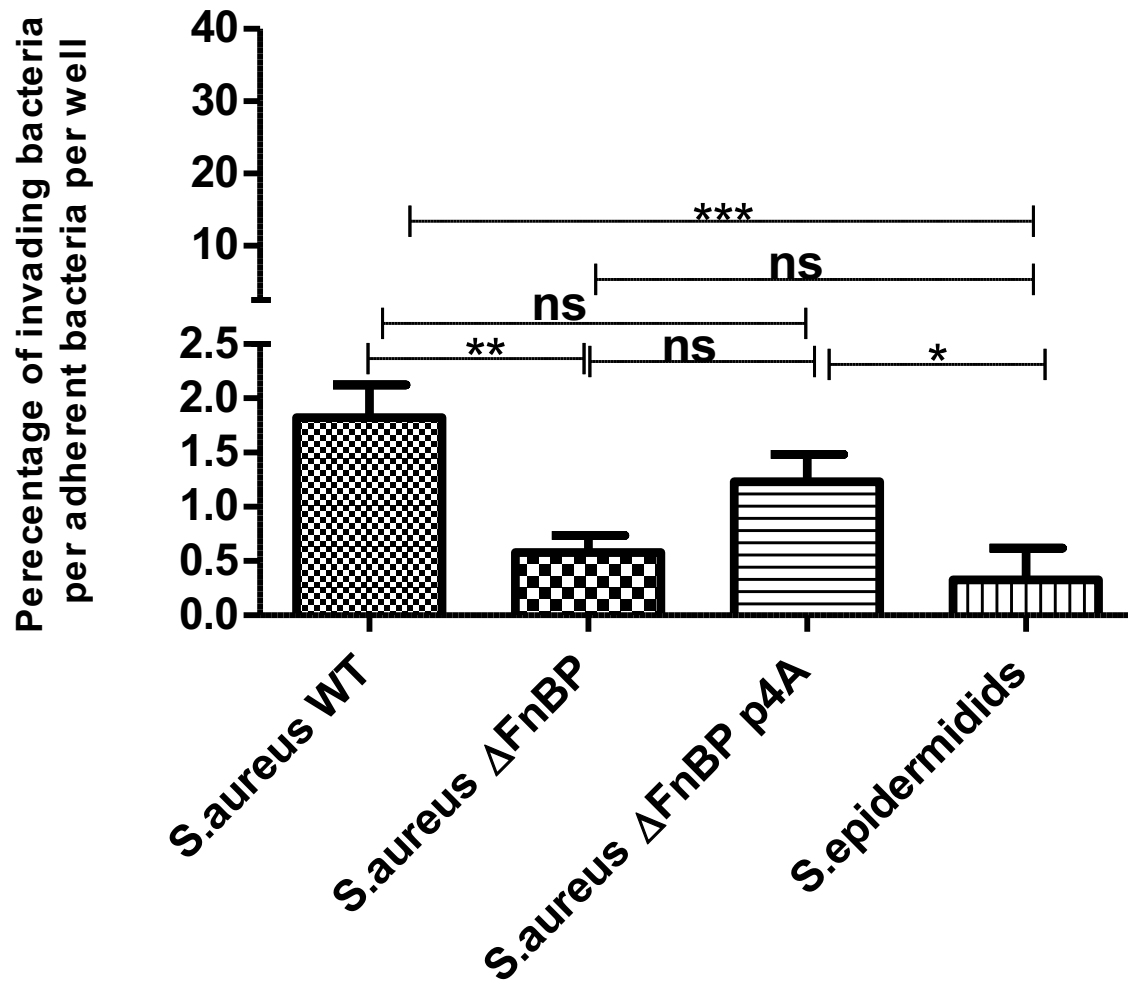

**Figure 12**

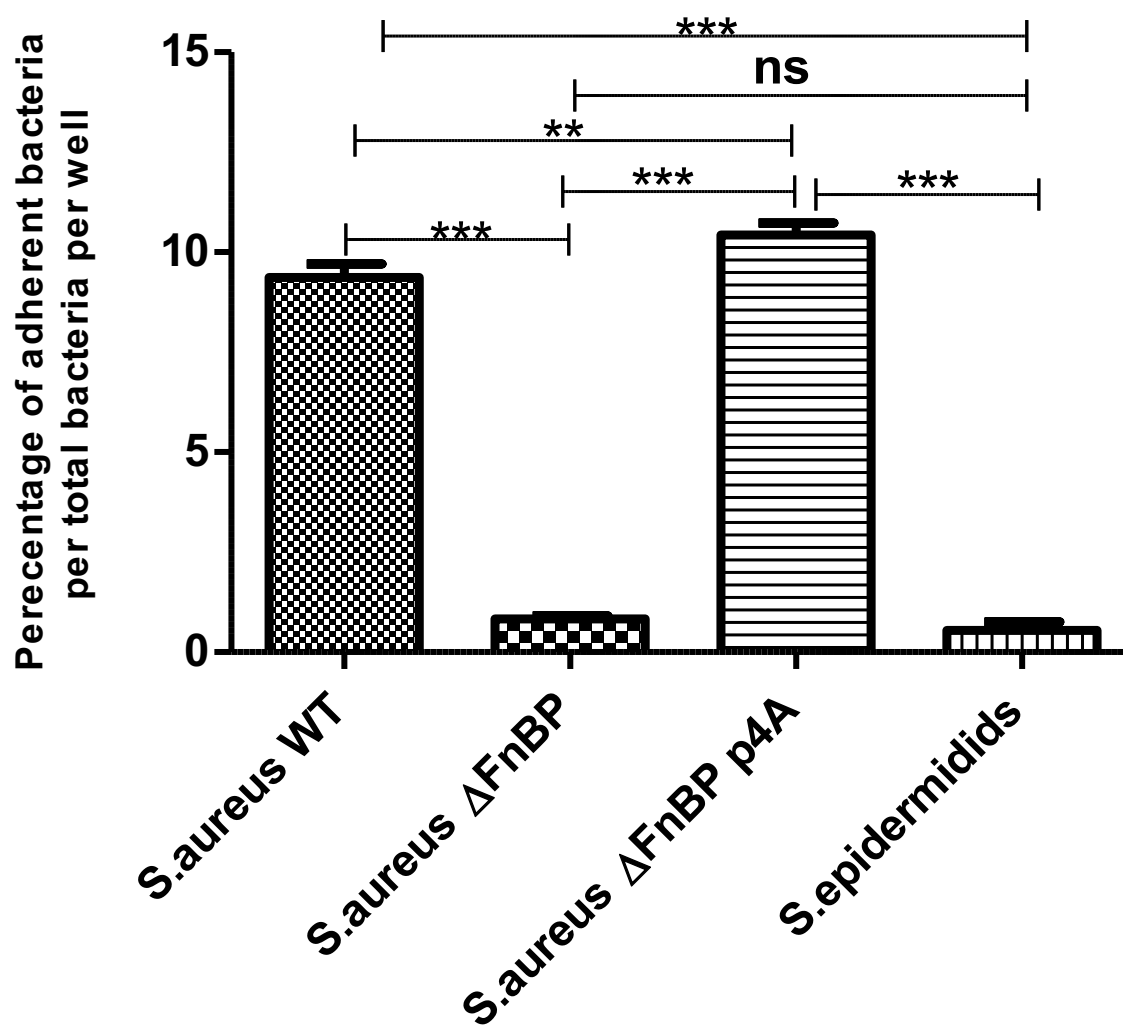

**Figure 13**

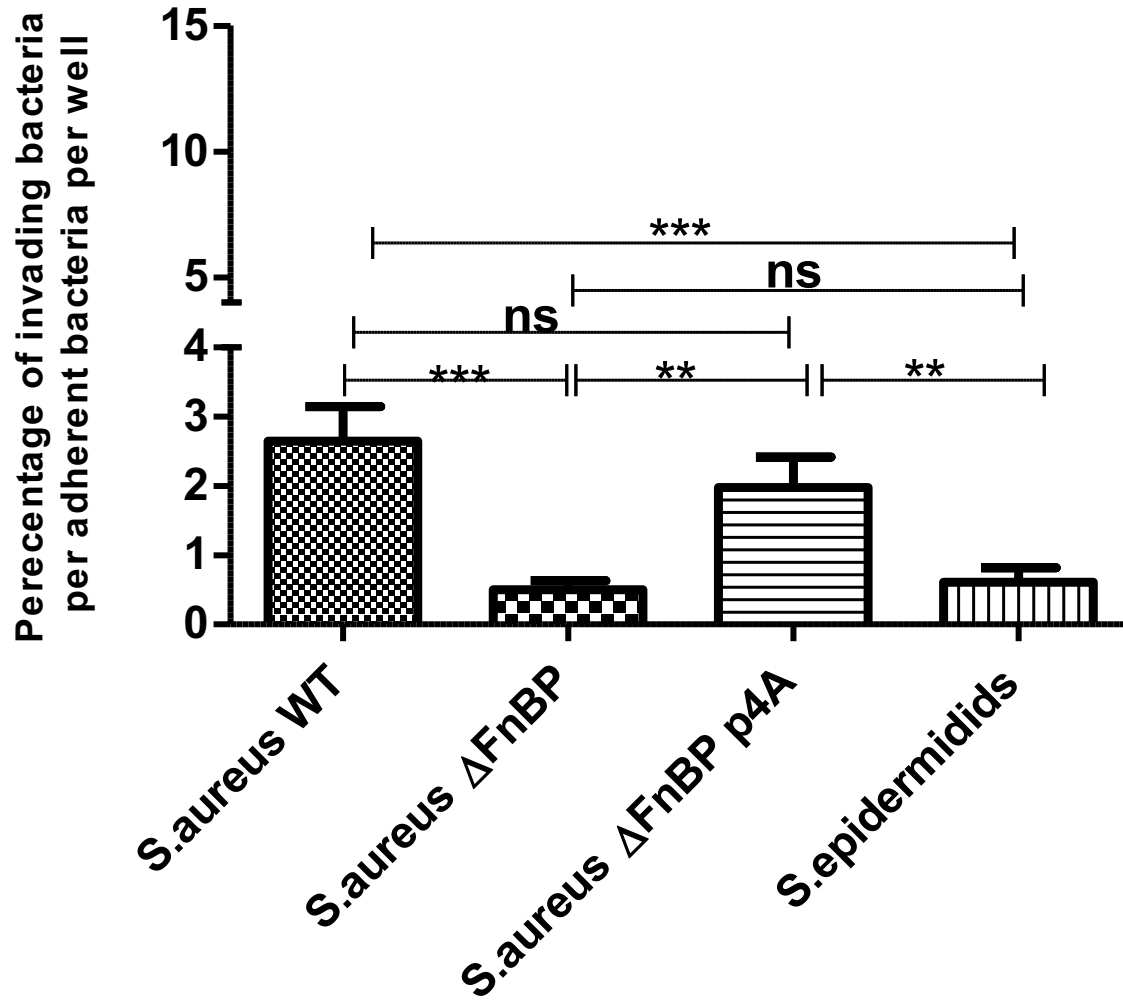

Source: https://www.biorxiv.org/content/10.1101/2020.01.09.900373v1.full.pdf
